1           **NSUN2-mediated m<sup>5</sup>C methylation of IRF3 mRNA negatively**  
2                           **regulates type I interferon responses**

3   Hongyun Wang<sup>1</sup>, Lu Zhang<sup>1</sup>, Cong Zeng<sup>2</sup>, Jiangpeng Feng<sup>1</sup>, Ke Xu<sup>1</sup>, Ke Lan<sup>1</sup>, Yu  
4   Zhou<sup>1</sup>, Yu Chen<sup>1\*</sup>

5

6   <sup>1</sup>State Key Laboratory of Virology, Modern Virology Research Center, College of Life  
7   Sciences, Wuhan University, Wuhan, China.

8   <sup>2</sup>College of Veterinary Medicine, The Ohio State University, Columbus, USA.

9

10   \*Corresponding author:

11   Yu Chen, State Key Laboratory of Virology, Modern Virology Research Center,  
12   College of Life Sciences, Wuhan University, Wuhan, 430072, P. R. China. E-mail:  
13   chenyu@whu.edu.cn

14

15 **Abstract**

16 5-Methylcytosine (m<sup>5</sup>C) is a widespread post-transcriptional RNA modification  
17 and is reported to be involved in manifold cellular responses and biological processes  
18 through regulating RNA metabolism. However, its regulatory role in antiviral innate  
19 immunity has not yet been elucidated. Here, we report that NSUN2, a typical m<sup>5</sup>C  
20 methyltransferase, can negatively regulate type I interferon responses during viral  
21 infection. NSUN2 specifically mediates m<sup>5</sup>C methylation of *IRF3* mRNA and  
22 accelerates its degradation, resulting in low levels of IRF3 and downstream IFN- $\beta$   
23 production. Knockout or knockdown of NSUN2 could enhance type I interferon  
24 responses and downstream ISG expression after viral infection *in vitro*. And *in vivo*,  
25 the antiviral innate responses is more dramatically enhanced in *Nsun2*<sup>+/-</sup> mice than in  
26 *Nsun2*<sup>+/+</sup> mice. Four highly m<sup>5</sup>C methylated cytosines in *IRF3* mRNA were identified,  
27 and their mutation could enhance the cellular *IRF3* mRNA levels. Moreover, infection  
28 with Sendai virus (SeV), vesicular stomatitis virus (VSV), herpes simplex virus 1  
29 (HSV-1), Zika virus (ZIKV), or especially SARS-CoV-2 resulted in a reduction in  
30 endogenous levels of NSUN2. Together, our findings reveal that NSUN2 serves as a  
31 negative regulator of interferon response by accelerating the fast turnover of *IRF3*  
32 mRNA, while endogenous NSUN2 levels decrease after viral infection to boost  
33 antiviral responses for the effective elimination of viruses. Our results suggest a  
34 paradigm of innate antiviral immune responses ingeniously involving  
35 NSUN2-mediated m<sup>5</sup>C modification.

36

## 37 **Introduction**

38 RNA modification is an important post-transcriptional modification process. To  
39 date, more than 100 types of chemical modifications to various types of RNAs have  
40 been recorded (1). Among these RNA modifications, N6-methyladenosine ( $m^6A$ ) and  
41 5-methylcytosine ( $m^5C$ ) are ubiquitous, and have led to an increasing appreciation  
42 that RNA methylation can functionally regulate gene expression and cellular activity  
43 (2-4). The methyltransferase (writer), demethylase (eraser), and effector (reader) play  
44 coordinating roles in RNA metabolism, such as splicing, degradation, and translation  
45 (5-9). Recently, it was found that  $m^6A$  methylation could negatively regulate  
46 interferon response by inducing *IFNB* mRNA degradation (10, 11). It was reported  
47 that  $m^6A$  RNA-modification-mediated downregulation of the OGDH-itaconate  
48 pathway reprograms cellular metabolism to inhibit viral replication (12). Another  
49 study demonstrated that ALKBH5, an  $m^6A$  demethylase, could be recruited by  
50 DDX46 and then erase the  $m^6A$  modification in *MAVS*, *TRAF3*, and *TRAF6*  
51 transcripts, thereby enforcing their retention in the nucleus and leading to their  
52 decreased translation, resulting in inhibited type I interferon production (13).  
53 Additionally, nuclear hnRNPA2B1 facilitates  $m^6A$  modification and  
54 nucleocytoplasmic trafficking of *CGAS*, *IFI16*, and *STING* mRNAs, resulting in  
55 amplification of the innate immune response to DNA viruses (14). At present,  $m^5C$  is  
56 not well studied compared to  $m^6A$ . The primary writers for  $m^5C$  methylation of RNA  
57 in animals have been proposed to be NSUN2 and TRDMT1 (DNMT2) (15, 16).  
58 NSUN2 is reported to regulate the expression of numerous genes by methylating their  
59 mRNAs and thereby affecting their degradation or translation (17-20). Another report  
60 emphasized the transcriptome-wide role of NSUN2 as a major methyltransferase of  
61 the  $m^5C$  epitranscriptomic mark and presented compelling evidence for the functional  
62 interdependence of mRNA  $m^5C$  methylation and mRNA translation (21). Furthermore,  
63 it was reported that ALYREF and YBX1 served as potential  $m^5C$  readers that could  
64 recognize  $m^5C$ -modified mRNA and mediate mRNA export from the nucleus or affect  
65 the stability of their target mRNAs (22-26). Nevertheless, the demethylases

66 responsible for removing m<sup>5</sup>C methylation on RNA have not yet been identified.  
67 Moreover, whether the m<sup>5</sup>C modification participates in the regulation of antiviral  
68 innate immunity, similarly to m<sup>6</sup>A modification, and especially in regulating the  
69 production of type I interferon responses, remains to be defined.

70

71 Elicitation of type I interferons (IFNs) by viruses or other pathogens plays an  
72 extremely critical role in innate immunity. The induction of type I interferons is  
73 primarily controlled at the level of gene transcription, wherein the interferon  
74 regulatory factor (IRF) family of transcription factors plays a central role (27-30).  
75 Interferon regulatory factor 3 (IRF3) acts as a master transcription factor responsible  
76 for the induction of type I interferons and is essential for the establishment of antiviral  
77 innate immunity (31, 32). After viral infection, IRF3 is phosphorylated by the kinases  
78 TBK1 and IKKε on its C-terminal and undergoes a conformational change and  
79 homodimerization, which leads to its translocation to the nucleus and subsequent  
80 association with the interferon-stimulated response elements of target genes (33, 34).  
81 Because of its pivotal role in the induction of type I interferons, the transcription  
82 factor IRF3 requires sophisticated regulation in order to effectively maintain immune  
83 homeostasis after viral infection. It has been reported that a great deal of regulators of  
84 IRF3 participate in maintaining the appropriate amounts of type I interferons  
85 stimulated by viral infection (35-38). The reported regulators of IRF3 mostly induce  
86 changes in the phosphorylation levels or quantity of IRF3 protein, which then affects  
87 type I interferon responses and downstream ISG. Most reports mainly focus on the  
88 regulation of IRF3 at the protein level. However, there are few reports about the  
89 regulation of IRF3 at the mRNA level, especially involving epigenetic modification.

90

91 Herein, we revealed that NSUN2, a typical RNA m<sup>5</sup>C methyltransferase, serves  
92 as a negative regulator of type I interferon responses in antiviral innate immunity. We  
93 found that NSUN2 could specifically mediate m<sup>5</sup>C methylation of *IRF3* mRNA and  
94 accelerate its degradation, and that knockout or knockdown of NSUN2 could elevate  
95 both mRNA and protein levels of IRF3 and thus amplify type I interferon responses

96 and downstream ISG expression after viral infection. Four highly m<sup>5</sup>C-methylated  
97 cytosines in *IRF3* mRNA were identified using bisulfite RNA sequencing, and the  
98 mutation of these cytosines could enhance the IRF3 levels and IFN- $\beta$  production. We  
99 outline a paradigm of innate immune responses to viral infection in which genes are  
100 ingeniously regulated by epigenetic modification.

101

## 102 **Results**

### 103 **NSUN2 negatively regulates type I interferon responses**

104 To explore the function of RNA methyltransferase or demethylases involved in  
105 type I interferon responses, we knocked down different RNA methyltransferases or  
106 demethylases in HEK293T cells using small interfering RNAs (siRNAs) and detected  
107 the endogenous levels of *IFNB* mRNA. We found that compared with other  
108 methyltransferases or demethylases, knockdown of NSUN2 could more dramatically  
109 enhance endogenous *IFNB* mRNA levels (**Fig. 1a**). To confirm the impact of NSUN2  
110 on type I interferon responses, we examined the effect of exogenous NSUN2  
111 expression and found that it could inhibit the activation of IFN- $\beta$  promoter activity  
112 induced by Sendai virus (SeV) in a dose-dependent manner (**Fig. 1b**). Exogenous  
113 NSUN2 expression could also inhibit the activation of IFN- $\beta$  promoter activity  
114 induced by different stimulants (**Fig. 1c**). In NSUN2 knockdown HEK293T cells, the  
115 SeV-induced increase in endogenous *IFNB* mRNA levels was dramatically enhanced  
116 as was the mRNA levels of downstream *ISG15* and *CXCL10* (**Fig. 1d**). Moreover,  
117 SeV-induced type I interferon responses were significantly enhanced in NSUN2  
118 knockout HEK293T cells (**Fig. 1e**) and A549 cells (**Supplementary Fig S1a**).

119

120 We next investigated whether NSUN2 is involved in antiviral responses during  
121 vesicular stomatitis virus (VSV) infection. Knockout of NSUN2 in HEK293T  
122 significantly inhibited the replication of VSV carrying a green fluorescent protein  
123 (GFP) reporter (VSV-GFP) (**Fig. 1f and 1g**). The same results were also obtained in  
124 NSUN2-knockout A549 cell lines compared with wild-type A549 cells  
125 (**Supplementary Fig S1b-e**). These results indicate that knockout of NSUN2 results  
126 in cells being less vulnerable to VSV-GFP infection compared to wild-type cells. To  
127 further confirm that the inhibition of VSV replication in the NSUN2-deficient cells  
128 was indeed due to more potent type I interferon responses, we tested whether  
129 inhibition of interferon pathway affected VSV propagation. For this, we used  
130 ruxolitinib, a potent and selective JAK 1/2 inhibitor that blocks signaling downstream

131 of type I interferon receptors. As shown in **Fig. 1h**, the inhibition of VSV propagation  
132 in NSUN2-knockout cells could be rescued by ruxolitinib treatment, which further  
133 confirms that the effects of NSUN2 deficiency on VSV propagation involve antiviral  
134 type I interferon responses. These results strongly suggest that NSUN2 is a negative  
135 regulator of type I interferon responses and that NSUN2 deficiency prominently  
136 enhances antiviral innate responses and, thus, inhibits virus propagation.

137

138 To further investigate the biological role of NSUN2 during viral infection, we  
139 observed that the *Nsun2* mRNA indeed decreased with the progression of time  
140 following infection of bone-marrow-derived dendritic cells (BMDCs) by SeV, herpes  
141 simplex virus 1 (HSV-1), VSV, or Zika virus (ZIKV), which reveals the potential role  
142 of NSUN2 during viral infections (**Fig. 1i**). Of note, we found that SARS-CoV-2  
143 infection could also significantly reduce *NSUN2* mRNA levels in Caco-2 cells (**Fig.**  
144 **1j**). We further carried out transcriptome sequencing of the RNAs isolated from the  
145 bronchoalveolar lavage fluid (BALF) of two COVID-19 patients (39). *NSUN2* mRNA  
146 was consistently reduced in COVID-19 patients compared with healthy individuals  
147 (**Fig. 1k**). Taken together, the results indicate that NSUN2 may serve as a negative  
148 regulator of type I interferon responses, and that expression of NSUN2 is dramatically  
149 reduced to enhance antiviral type I interferon responses during infection with different  
150 viruses, including SARS-CoV-2.

151

### 152 **NSUN2 inhibits type I interferon responses by regulating IRF3 expression levels**

153 To investigate the mechanism of NSUN2 in the regulation of type I interferon  
154 responses, exogenous NSUN2 expression markedly suppressed the PRDIII-I-luc  
155 activity induced by upstream activators, including RIG-I, MDA5, MAVS, TBK1, and  
156 the constitutively active phosphorylation mimetic IRF3-5D (**Fig. 2a**), while  
157 knockdown of NSUN2 had the opposite effect (**Fig. 2b**). Since IRF3 is the final factor  
158 in the process of initiation of type I interferon responses, we speculated that NSUN2  
159 may exert its function at IRF3 node. As shown in **Fig. 2c**, immunoblot analysis  
160 revealed that exogenous NSUN2 expression could inhibit the expression of

161 endogenous IRF3 and that the levels of endogenous IRF3 were enhanced in  
162 NSUN2-knockout cells compared with those in wild-type HEK293T (**Fig. 2d**) and  
163 A549 (**Fig. 2e**) cells. By contrast, endogenous TBK1 protein levels did not show  
164 significant change. Moreover, knockout of NSUN2 promoted levels of IRF3 Ser396  
165 phosphorylation but not TBK1 Ser172 phosphorylation (**Fig. 2e and 2f**). These results  
166 demonstrate that NSUN2 deletion could enhance the overall levels of IRF3 protein as  
167 well as its phosphorylation. Next, we conjugated the IRF3-CDS (coding sequence)  
168 with EGFP to allow for visual characterization of responses in IRF3 expression by  
169 fluorescence. We observed that exogenous NSUN2 expression inhibited the  
170 fluorescence of IRF3-CDS-EGFP (**Fig. 2g**). To summarize, these results reveal that  
171 NSUN2 could specifically inhibit the expression of IRF3 and thus negatively regulate  
172 type I interferon responses following virus infection.

173

#### 174 **NSUN2 catalyzes m<sup>5</sup>C methylation of *IRF3* mRNA**

175 Since NSUN2 has been reported to regulate some genes by methylating their  
176 mRNAs and affecting RNA fate or function (17, 19, 20), we speculated that it might  
177 physically interact with *IRF3* mRNA. Firstly, co-immunoprecipitation followed by  
178 immunoblot analysis showed that there was no interaction between NSUN2 and IRF3  
179 protein in HEK293T (**Fig. 3a**). We further overexpressed and immunoprecipitated  
180 NSUN2 protein in SeV-stimulated HEK293T cells and subjected it to RNA extraction  
181 and qPCR. The results reveal that NSUN2 indeed binds with endogenous *IRF3*  
182 mRNA, while endogenous *TBK1* mRNA did not interact with NSUN2 (**Fig. 3b**).  
183 Furthermore, knockdown or knockout of NSUN2 boosted endogenous *IRF3* mRNA  
184 levels while endogenous *TBK1* mRNA levels were not affected (**Fig. 3c and 3d**,  
185 **Supplementary Fig S2**). We then detected the half-life of endogenous *IRF3* mRNA  
186 in wild-type and *NSUN2*<sup>-/-</sup> HEK293T cells following treatment of actinomycin D  
187 (ActD) which inhibits mRNA transcription in mammalian cells. The results show that  
188 knockout of NSUN2 significantly increased the half-life of *IRF3* mRNA from 6.48 h  
189 in wild-type cells to 12.39 h in NSUN2 knockout cells (**Fig. 3e**), while the half-life of  
190 *TBK1* mRNA had no significant difference, from 4.48 h in wild-type cells to 5.08 h in



191 NSUN2 knockout cells. Consistent results were also found in A549 cells, as shown in  
192 **Supplementary Fig S3**. These results indicate that NSUN2 decreased IRF3 protein  
193 levels dramatically by binding to *IRF3* mRNA and accelerating its degradation.

194

195 Since NSUN2 is a typical RNA methyltransferase catalyzing the formation of m<sup>5</sup>C  
196 in coding and non-coding RNAs, we speculated that NSUN2 might catalyze the  
197 formation of m<sup>5</sup>C in *IRF3* mRNA and then induce its degradation. Therefore, we  
198 prepared RNA segments of *RIG-I*, *MAVS*, *TBK1*, and *IRF3*, the four key signaling  
199 molecules that determine the innate immune response to viral infection, by *in vitro*  
200 transcription. Micro-125b, which can be methylated by NSUN2, served as a positive  
201 control (40). The RNAs were used for *in vitro* methylation assays using recombinant  
202 GST-NSUN2 and <sup>3</sup>H-labeled S-adenosyl methionine (SAM). The transcribed *IRF3*  
203 mRNA could be highly methylated by NSUN2 compared with transcripts of *RIG-I*,  
204 *MAVS*, and *TBK1* (**Fig. 4a and 4b**). The data suggest that NSUN2 could specifically  
205 mediate the methylation of *IRF3* mRNA *in vitro*. To determine which region might be  
206 methylated, we divided *IRF3* mRNA into seven parts, including 5'UTR (1–235 nt),  
207 CDS1 (236–485 nt), CDS2 (486–735 nt), CDS3 (736–985 nt), CDS4 (986–1235 nt),  
208 CDS5 (1236–1519 nt), and 3'UTR (1520–1595 nt) (**Fig. 4a**). As is demonstrated in  
209 **Fig. 4c**, *IRF3* 5'UTR, 3'UTR, CDS2, and CDS3 were highly methylated by NSUN2  
210 compared with other segments. To further verify whether endogenous *IRF3* mRNA  
211 could be methylated by NSUN2 *in vivo*, we pulled down endogenous *IRF3* mRNA  
212 using specific *IRF3* CHIRP probes which were 3'biotin-TEG-modified. Equal  
213 amounts of endogenous *IRF3* mRNA were loaded on the membrane, and the levels of  
214 m<sup>5</sup>C were assayed. As is shown in **Fig. 4d**, the m<sup>5</sup>C methylation level of *IRF3* mRNA  
215 in NSUN2 knockout cells was markedly lower than that of wild-type cells.  
216 Reconstitution of exogenous NSUN2 into NSUN2 knockout cells restored the m<sup>5</sup>C  
217 methylation levels of endogenous *IRF3* mRNA. Consistent with this, the results of  
218 m<sup>5</sup>C MeRIP showed that the levels of endogenous m<sup>5</sup>C methylated *IRF3* mRNA in  
219 NSUN2 knockout cells was significantly lower than in wild-type cells, and exogenous  
220 NSUN2 expression could dramatically enhance the levels of endogenous

221 m<sup>5</sup>C-methylated *IRF3* mRNA (**Fig. 4e**). To investigate the biological function of m<sup>5</sup>C  
222 methylation of *IRF3* mRNA by NSUN2, we constructed pGL3-derived reporters  
223 bearing either IRF3-5'UTR, IRF3-CDS, or IRF3-3'UTR. We tested the activity of  
224 these reporters in NSUN2-knockout HEK293T cells compared with those in wild-type  
225 HEK293T. As shown in **Fig. 4f**, knockout of NSUN2 could significantly increase the  
226 luciferase activity of reporter pGL3-IRF3-5'UTR, pGL3-IRF3-CDS, and  
227 pGL3-IRF3-3'UTR. The above results demonstrate that NSUN2 could mediate m<sup>5</sup>C  
228 methylation of *IRF3* mRNA both *in vitro* and *in vivo*, and that the four highly  
229 methylated regions in *IRF3* mRNA are the major targets of NSUN2. This methylation  
230 might result in the degradation of *IRF3* mRNA and, thereby, decreased levels of IRF3  
231 protein.

232

233 To further confirm whether m<sup>5</sup>C methyltransferase activity of NSUN2 is the  
234 determining factor that results in the inhibition of interferon responses, we generated  
235 different NSUN2 methyltransferase mutants, including C271A and C321A, which are  
236 reported to be the key sites whereby their mutation may inhibit NSUN2 m<sup>5</sup>C  
237 methyltransferase activity (22), as well as several predicted inactivating mutations. The  
238 *in vitro* methylation results show that the NSUN2 mutants, including C184A, D215A,  
239 R220A, and D268A, had partially decreased methylation activity, while C321A and  
240 I302A mutations almost completely abolished catalytic activity. However, C271A  
241 resulted in mildly increased catalytic activity of NSUN2 (**Fig. 4g**). Of note, we  
242 investigated the relationship between the methylation activities and the stimulation of  
243 IFN- $\beta$  pathway in an SeV-triggered IFN- $\beta$ -Luc reporter system. As shown in **Fig. 4h**,  
244 some of inhibition ability in SeV-induced-IFN- $\beta$  luciferase assay was lost following  
245 overexpression of either I302A or C321A compared with wild-type NSUN2, while  
246 C271A could enhance the inhibition ability compared with wild-type NSUN2.  
247 Moreover, we found that the double mutant I302A/C321A had totally lost its  
248 inhibition ability in terms of both function (**Fig. 4i**) and effects on *IFNB* mRNA levels  
249 (**Fig. 4j**) in *NSUN2*<sup>-/-</sup> HEK293T cells. We further detected the m<sup>5</sup>C methylation  
250 levels of total RNA in *NSUN2*<sup>-/-</sup> HEK293T cells transfected with NSUN2 or its

251 mutants using dot blot analysis. In accordance with the above results, I302A/C321A  
252 double mutation resulted in almost complete loss of m<sup>5</sup>C methyltransferase activity,  
253 while C271A still maintained m<sup>5</sup>C methyltransferase activity (**Fig. 4k**). Moreover,  
254 ALYREF has been characterized as an m<sup>5</sup>C reader in the nucleus, facilitating the  
255 export of m<sup>5</sup>C-modified mRNAs (22). The negatively regulation of type I interferon  
256 responses by NSUN2 may also occur in collaboration with ALYREF, which has also  
257 been independently observed to negatively regulate type I interferon responses, as  
258 depicted in **Supplementary Fig S4**. To summarize, NSUN2 could catalyze the  
259 formation of m<sup>5</sup>C modification of *IRF3* mRNA and accelerate its fast turnover and  
260 regulate IRF3-mediated type I interferon responses. Of note, this regulation by  
261 NSUN2 is dependent on its m<sup>5</sup>C methyltransferase activity.

262

#### 263 **Four methylated cytosines of *IRF3* mRNA were identified to regulate RNA levels**

264 We also aimed to identify the exact methylation cytosines in *IRF3* mRNA. Using  
265 bisulfite sequencing assays (**Fig. 5a**), we identified four cytosines in *IRF3* mRNA as  
266 major sites of methylation that were highly methylated by recombinant NSUN2  
267 protein *in vitro*: C169 (11/20, 55%) in 5'UTR, C1569 (15/20, 75%) in 3'UTR, C556  
268 (9/16, 56.25%) in CDS2 (486–735), and C815 (7/16, 43.75%) in CDS3 (736–985),  
269 which is consistent with the four high methylation regions observed earlier in *IRF3*  
270 mRNA (**Fig. 4c and 5b-c, Supplementary Fig S5**). We then tested whether these four  
271 identified highly methylated cytosines are indeed methylated and involved in the  
272 regulation of *IRF3* mRNA by NSUN2 protein. It was observed that mutations C169nt  
273 (C to G) in the 5'UTR, C1569nt (C to G) in the 3'UTR, C556nt (C to T) in CDS2  
274 (486–735) and C815nt (C to A) in CDS3 (736–985) reduced the methylation level by  
275 half in biochemical assays with recombinant NSUN2 (**Fig. 5d**). We then constructed  
276 expression plasmids containing either wild type *IRF3* full length (*IRF3*-FL, 1-1595nt)  
277 or various site-mutated *IRF3*-FLs. We observed that mutations of the four cytosines  
278 could consistently enhance the expression levels of *IRF3* mRNA in *Irf3*<sup>-/-</sup>*Irf7*<sup>-/-</sup>  
279 MEFs compared to wild type *IRF3* full length (*IRF3*-FL-WT) (**Fig. 5e**).  
280 Correspondingly, the *IRF3*-mediated *Ifnb* mRNA levels were also remarkably

281 elevated upon SeV infection (**Fig. 5f**). We also utilized the lentiviral system to  
282 generate stable IRF3 cell lines in *Irf3*<sup>-/-</sup>*Irf7*<sup>-/-</sup> MEFs. The *IRF3* mRNA levels in the  
283 IRF3-FL-Mut (IRF3-FL-5'&3'UTR-CDS2&3-Cm) stable cell line was 15-fold higher  
284 than that in the IRF3-FL-WT stable cell line. Moreover, exogenous NSUN2  
285 expression significantly reduced *IRF3* mRNA levels in the IRF3-FL-WT stable cell  
286 line, while *IRF3* mRNA levels in the IRF3-FL-Mut stable cell line were mildly  
287 decreased, indicating that methylation of these four cytosines in *IRF3* mRNA might  
288 predominantly influence its stability (**Fig. 5g**). To confirm this, we measured the  
289 stability of these transcripts and found that the IRF3-FL-Mut transcript was  
290 remarkably more stable than the IRF3-FL-WT transcript, indicating that methylation  
291 of these four cytosines by NSUN2 is indeed critical for regulating *IRF3* mRNA  
292 stability (**Fig. 5h**). Taken together, our results demonstrate that the loss of m<sup>5</sup>C  
293 modification could lead to increased stability of *IRF3* mRNA and enhanced IFN-β  
294 production, thus facilitating a stronger antiviral response, and that the four highly  
295 methylated cytosines in *IRF3* mRNA play a critical role in NSUN2-mediated  
296 regulation of antiviral responses.

297

### 298 **Pivotal role of NSUN2 in the induction of type I interferon and antiviral response** 299 *in vivo*

300 To determine the role of NSUN2 in antiviral response *in vivo*, we created targeted  
301 deletions of NSUN2 in mice by removing 10 bp in exon 3 of *Nsun2* genome by  
302 CRISPR-Cas9, which resulted in a frameshift mutation. However, we found that  
303 *Nsun2*<sup>-/-</sup> mice died in utero. We found that *Nsun2*<sup>+/-</sup> progeny could reach adulthood,  
304 so we chose *Nsun2*<sup>+/-</sup> mice as “NSUN2-knockdown mice”. As expected, the *Nsun2*  
305 expression in *Nsun2*<sup>+/-</sup> mice did reduce by half than their wild-type littermates (**Fig.**  
306 **6a**). We then investigated innate antiviral responses in *Nsun2*<sup>+/+</sup> mice and *Nsun2*<sup>+/-</sup>  
307 mice. As shown in **Fig. 6b**, the production of *Ifnb* mRNA was more dramatically  
308 enhanced in bone-marrow-derived dendritic cells (BMDCs) from *Nsun2*<sup>+/-</sup> mice than  
309 in those from their wild-type littermates following infection with SeV, HSV-1 or VSV.  
310 The IFN-β mediated downstream *Isg15* and *Cxcl10* were also significantly enhanced

311 in BMDCs from *Nsun2*<sup>+/-</sup> mice (**Fig. 6c**). We also observed significantly higher  
312 IFN-β and IFN-α production in the serum of *Nsun2*<sup>+/-</sup> mice after intraperitoneal  
313 injection of VSV by ELISA (**Fig. 6d**). Furthermore, we found a higher IFN-β  
314 production and a lower viral burden of VSV in various organs of *Nsun2*<sup>+/-</sup> mice than  
315 in wild-type mice at the mRNA levels (**Fig. 6e**). We also compared the survival rates  
316 after intraperitoneal injection of VSV. The results indicate that *Nsun2*<sup>+/+</sup> mice were  
317 more vulnerable to VSV-triggered mortality than were *Nsun2*<sup>+/-</sup> mice (**Fig. 6f**). All  
318 these data suggest that NSUN2, the expression of which is reduced during viral  
319 infection, was quite pivotal for the induction of type I interferon and antiviral  
320 responses *in vivo*.  
321

322 **Discussion**

323 Antiviral innate immunity involves sophisticated signaling pathways for sensing  
324 pathogens and initiating innate immune responses against infection, which requires  
325 ingenious regulation at different levels including transcriptional, translational, and  
326 post-translational. It is known that IRF3, which plays a vital role in the initiation of  
327 type I interferon responses after infection, is regulated by multiple modifications, such  
328 as phosphorylation, ubiquitination, and acetylation, which function in maintaining  
329 immune homeostasis (38, 41, 42). Recently, the m<sup>6</sup>A machinery has been reported to  
330 be involved in immune responses via epigenetic modification. For example, it has  
331 been reported that the m<sup>6</sup>A machinery could inhibit the innate immune response to  
332 infection by directly dictating the fast turnover of *IFNB* mRNAs and consequently  
333 facilitating viral propagation (10). Another study demonstrated that ALKBH5 could  
334 erase the m<sup>6</sup>A modification of *MAVS*, *TRAF3*, and *TRAF6* mRNAs, enforce their  
335 retention in the nucleus and result in their decreased translation and inhibited type I  
336 interferon production (13). Moreover, hnRNPA2B1 was reported to function as an  
337 m<sup>6</sup>A “modulator” that promotes m<sup>6</sup>A modification and nucleocytoplasmic trafficking  
338 of *CGAS*, *IFI16*, and *STING* mRNAs in response to DNA virus infection, leading to  
339 the enhanced production of type I interferons (14). The effects of m<sup>6</sup>A modification on  
340 interferon responses may vary because of the different systems and different readers  
341 and precise downstream regulation. However, no report has demonstrated that m<sup>6</sup>A  
342 modification could regulate interferon responses by directly methylating IRF3. More  
343 importantly, there are, to date, no reports of m<sup>5</sup>C modification regulating antiviral  
344 innate immunity.

345

346 In this study, we revealed a novel mechanism by which the m<sup>5</sup>C machinery  
347 functions in innate immune responses via the methylation of *IRF3* mRNA to  
348 negatively regulate type I interferon responses, indicating that the m<sup>5</sup>C and m<sup>6</sup>A  
349 machineries may have different specificities with respect to regulating multiple  
350 signaling molecules involved in antiviral innate immune responses. We demonstrated  
351 that NSUN2 could specifically methylate *IRF3* mRNA via four major cytosine sites.

352 The mutation of these four major cytosines enhanced the stability and expression of  
353 *IRF3* mRNA (**Fig. 5**) and, thereby, interferon responses. Moreover, in our system, the  
354 m<sup>6</sup>A machinery was also found to be involved in regulating interferon responses (**Fig.**  
355 **1a**), but the overall effect was not significant compared with the m<sup>5</sup>C machinery,  
356 which may be because the m<sup>6</sup>A machinery regulates other signaling molecules with  
357 different effects, as mentioned above. However, we do not preclude the possibility that  
358 other mechanisms beyond an elevation in *IRF3* mRNA stability may contribute to the  
359 stronger type I interferon responses following knockout of NSUN2. We may speculate  
360 that the mRNAs of some other signaling molecules, or the *IFNB* mRNA, may also be  
361 m<sup>5</sup>C-modified by NSUN2, such as is the case with m<sup>6</sup>A modification. Future work is  
362 required to demonstrate how m<sup>5</sup>C methylation and its downstream recognition and  
363 regulation collaboratively and precisely function in antiviral innate immunity.

364

365 Moreover, we found that the regulation of type I interferon responses by NSUN2  
366 was dependent on its m<sup>5</sup>C methyltransferase activity. According to our results (**Fig.**  
367 **4g–k**), the NSUN2 I302A/C321A mutant had almost completely lost its m<sup>5</sup>C  
368 methyltransferase activity and ability to regulate type I interferon responses, which is  
369 in contrast with the reports of C271A/C321A mutation of NSUN2 (22, 43). In our  
370 study, the C271A mutation maintained m<sup>5</sup>C methyltransferase activity in biochemical  
371 assays and could still negatively regulate interferon responses. The discrepancy in the  
372 key sites of NSUN2 methyltransferase activity may be due to the different systems  
373 and the different roles NSUN2 plays in multiple physiological processes. Further  
374 work is required to uncover the structure of NSUN2 protein and the key sites that  
375 determine its m<sup>5</sup>C methyltransferase activity and regulation activity in multiple  
376 physiological processes.

377

378 NSUN2 and TRDMT1 (DNMT2) are two m<sup>5</sup>C methyltransferases reported in  
379 animals, but the identity of the m<sup>5</sup>C demethylase remains unknown (15, 16). In our  
380 study, TRDMT1 did not show significant regulation of interferon responses unlike  
381 NSUN2. ALYREF has earlier been characterized as an m<sup>5</sup>C reader in the nucleus

382 involved in facilitating the export of m<sup>5</sup>C-modified mRNAs (22). In our results,  
383 exogenous NSUN2 expression could dramatically inhibit IFN-β production, and  
384 exogenous ALYREF expression could also (**Fig. 1a-c, Supplementary Fig S4**),  
385 which further confirmed that m<sup>5</sup>C modification is indeed involved in regulating type I  
386 interferon responses. YBX1 was identified as another m<sup>5</sup>C reader that could maintain  
387 the stability of its target mRNA by recruiting ELAVL1 (23). In our study, NSUN2  
388 could directly methylate *IRF3* mRNA and accelerates its degradation, which seems to  
389 contradict the function of the NSUN2–YBX1–ELAVL1 axis. These two seemingly  
390 opposing mechanisms may uncover the different roles that m<sup>5</sup>C modification play in  
391 various biological processes. Different m<sup>5</sup>C readers might have different functions  
392 and play different roles. For example, YTH family members have been reported to  
393 serve as m<sup>6</sup>A readers that recognize m<sup>6</sup>A-modified RNA and further regulate mRNA  
394 splicing, translation, or degradation (44-47). The specific degradation mechanism  
395 induced by m<sup>5</sup>C and m<sup>6</sup>A modification has not yet been clarified clearly and requires  
396 more investigation. Further work is required to delineate these different mechanisms  
397 and the different roles that m<sup>5</sup>C readers play. The m<sup>5</sup>C demethylase, which may  
398 maintain balance in the m<sup>5</sup>C modification level in various biological processes, must  
399 also be identified.

400

401 Furthermore, we found that NSUN2 expression is decreased after infections with  
402 different viruses, including SeV (negative-strand RNA virus), HSV-1 (DNA virus),  
403 VSV (negative-strand RNA virus), ZIKV (positive-strand RNA virus), and especially  
404 SARS-CoV-2 (positive-strand RNA virus, beta-coronavirus). Notably, transcriptome  
405 sequencing of the RNAs isolated from the bronchoalveolar lavage fluid (BALF) of  
406 two COVID-19 patients revealed that NSUN2 expression was dramatically decreased  
407 in COVID-19 patients compared with healthy individuals (**Fig. 1i-k**). We can  
408 therefore propose a model whereby NSUN2 is constitutively expressed in resting cells  
409 and that IRF3 expression is maintained at a relatively low level. During viral infection,  
410 endogenous NSUN2 expression levels decrease via unknown mechanism, which  
411 require further investigation for their elucidation, and the IRF3 expression level would



412 therefore be elevated to allow a stronger interferon response and the effective  
413 elimination of viruses.

414

415 In conclusion, our investigation has revealed a novel and profound role for m<sup>5</sup>C  
416 modification in regulating type I interferon responses. We have proposed a crosstalk  
417 between m<sup>5</sup>C methylation and antiviral innate immunity, and this might benefit the  
418 development of efficient therapeutic interventions for infectious diseases. To move  
419 forward, further work is urgently needed to precisely demonstrate how m<sup>5</sup>C  
420 methylation is involved in antiviral innate immunity and other physiological  
421 processes.

422

## 423 **Materials and Methods**

### 424 **Viruses, cells, and reagents**

425 SARS-CoV-2 WIV04 (IVCAS 6.7512) was kindly provided by Dr. Zheng-Li Shi.  
426 Sendai virus (SeV), herpes simplex virus 1 (HSV-1), and vesicular stomatitis virus  
427 carrying a GFP reporter gene (VSV-GFP) were kindly provided by Dr. Hong-Bing  
428 Shu. Zika virus (ZIKV) was kindly provided by Dr. Bo Zhang. Vesicular stomatitis  
429 virus (VSV) was kindly provided by Dr. Ming-Zhou Chen. Human colorectal  
430 adenocarcinoma (Caco-2), HEK293T, HeLa, Vero, and A549 cells were maintained in  
431 Dulbecco's modified Eagle's medium (DMEM) with 10% fetal bovine serum, 100  
432 U/mL penicillin and 100 µg/mL streptomycin, at 37 °C in 5% CO<sub>2</sub> incubator.  
433 Plasmids were transfected using Lipofectamine 2000 (Invitrogen, 11668027) or  
434 Neofect (Neofect, TF201201) following the manufacturer's instructions, and siRNAs  
435 (synthesized by RiboBio company) were transfected using Pepmute (SignaGen,  
436 SL100566) following the manufacturer's instructions. Ruxolitinib and actinomycin D  
437 were from MCE (MedChemExpress).

438

### 439 **Mice**

440 *Nsun2*<sup>+/-</sup> C57BL/6J mice were obtained from GemPharmatech Company (Nanjing,  
441 China) and housed and bred in specific pathogen-free conditions. The primers for  
442 genotyping were F-TGTCCAACAGAACAGTGAAGTGGAG and  
443 R-CCAAGCTCTTTAAGCCGACAGTG. All animal experiments were conducted in  
444 accordance with the Regulations of Hubei Province Laboratory Animal Management  
445 and approved by Wuhan University Animal Experiment Ethics Committee.

446

### 447 **Preparation of bone marrow-derived dendritic cells (BMDC)**

448 Bone marrow cells were isolated from C57BL/6J mouse tibia and femur and then  
449 cultured for 7–9 days in 10% FBS DMEM containing mouse GM-CSF (50 ng/mL,  
450 Peprotech).

451

452 **Preparation of bronchoalveolar lavage fluid (BALF) and RNA-seq library**  
453 **construction and sequencing**

454 The methods were the same as previously described (39). NSUN2 expression analysis  
455 in COVID-19 patients compared with healthy individuals was obtained from the  
456 analysis of previous results (<https://github.com/zhouyulab/ncov/>).

457

458 **Plasmids and RNA interference**

459 NSUN2 was cloned into both the pCAGGS and pGEX6P-1 vector. The sequences of  
460 siRNAs were si-h-NSUN2#1: GAGATCCTCTTCTATGATC; si-h-NSUN2#2:  
461 GGAGAACAAGCTGTTTCGAG; si-h-TRDMT1: GCGATATGCTCTTCT GTTA;  
462 si-h-METTL3: CTGCAAGTATGTTCACTATGA; si-h-METTL14:  
463 AAGGATGAGTTAATAGCTAAA; si-h-ALKBH5: GTCGGGACTGCATAATTA.  
464 Cells were seeded and siRNAs were transfected using Pepmute. The knockdown  
465 efficiency was detected 36 h after transfection using immunoblot analysis or qPCR.

466

467 **Antibodies and immunoblot analysis**

468 The antibodies used were as follows: rabbit anti-NSUN2 (Proteintech, 20854-1-AP),  
469 rabbit anti-Phospho-IRF-3-Ser396 (CST, 83611S), rabbit anti-IRF3 (Proteintech,  
470 11312-1-AP), rabbit anti-phospho-TBK1/NAK-Ser172 (CST, 14590S), rabbit  
471 anti-TBK1/NAK (CST, 38066S), mouse anti-HA (Sigma, H6908), rabbit anti-HA  
472 (Sigma, H3663), mouse anti-Flag (Proteintech, 66008-3-Ig), rabbit anti-Flag (Sigma,  
473 SAB4301135), mouse anti-m<sup>5</sup>C antibody (Abcam, ab10805), mouse anti-GAPDH  
474 (Proteintech, 60004-1-Ig), mouse anti- $\beta$ -actin (Proteintech, 66009-1-Ig). Cells were  
475 washed once with PBS and lysed in RIPA lysis buffer (50 mM Tris, pH 7.6, 1%  
476 NP-40, 150 mM NaCl, 0.1% SDS). 5 $\times$  SDS loading buffer was added to the protein  
477 sample and boiled for 5 min. Samples were resolved on SDS-PAGE and transferred  
478 onto nitrocellulose membrane (GE Healthcare), followed by blocking with TBS  
479 containing 0.1% Tween-20 (TBST) and 5% non-fat powdered milk or bovine serum  
480 albumin (BSA) and probing with different antibodies.

481

482 **Co-immunoprecipitation and RNA-binding protein immunoprecipitation (RIP)**

483 HEK293T cells were seeded onto 6 cm dishes and transfected as illustrated above.  
484 Thirty-six hours after transfection, cells were lysed in RIPA buffer (50 mM Tris, pH  
485 7.6, 1% NP-40, 150 mM NaCl, 0.1% SDS) containing protease inhibitors and  
486 phosphatase inhibitors, if necessary. The cell lysates were incubated overnight at 4 °C  
487 with HA-tag rabbit mAb beads (Sepharose Bead Conjugate, 3956S, CST) or Flag-tag  
488 rabbit mAb beads (Sepharose Bead Conjugate, 70569S, CST). The beads were  
489 washed five times with cold PBS and then mixed with SDS loading buffer and boiled  
490 for 10 min prior to SDS-PAGE and immunoblot analysis. For RNA  
491 immunoprecipitation, HEK293T cells were transfected and lysed with lysis buffer (20  
492 mM Tris-HCl, pH 7.6, 150 mM NaCl, 1% Triton-X100, 1 mM EDTA, 0.1% SDS, and  
493 2 mM DTT, RNase free) and incubated overnight at 4 °C with HA-tag rabbit mAb  
494 beads. Beads were washed five times with lysis buffer and divided in half for RNA  
495 extraction and qPCR analysis or for immunoblot analysis.

496

497 **RNA isolation and qPCR**

498 Total RNA was isolated using TRIzol reagent (Invitrogen) following the  
499 manufacturer's instructions. The isolated mRNA was reverse transcribed to cDNA  
500 using PrimeScript RT Reagent Kit (Takara, RR037A). Real-time quantitative PCR  
501 was carried out through ABI 7500 Real Time PCR System by SYBR Green Master  
502 Mix (YEASEN, 11199ES03). GAPDH was used in normalization via the  $\Delta\Delta C_t$   
503 method. Primer sequences are shown in Supplementary Table S1.

504

505 **Protein expression and purification**

506 *Escherichia coli* BL21 cells were transformed with pGEX-6p-1-GST-NSUN2 and  
507 cultured in 10 mL Luria broth medium at 37 °C for 6 h. The culture was then  
508 transferred to 1000 mL Luria broth medium and grown at 37 °C to an absorbance of  
509 0.6–1 as measured at 600 nm. IPTG was added to the culture to achieve a final  
510 concentration of 0.2 mM and induced at 16 °C for 16–20 hours. Cell cultures were  
511 harvested by centrifugation and then lysed by lysozyme and ultrasonication.

512 GST-tagged NSUN2 proteins were purified by affinity chromatography using reduced  
513 glutathione resin (GenScript, L00206) following the manufacturer's instructions.  
514 Finally, the recombinant proteins were eluted through incubation for 30 min at 4 °C  
515 with 100 µL of 50 mM Tris (pH 8.0), 2 mM DTT and 10 mM reduced glutathione and  
516 8% glycerine was added for snap-freezing in liquid nitrogen and storage at –80 °C  
517 until use. The purity and quantity of the recombinant proteins were assessed by  
518 SDS-PAGE followed by staining with Coomassie blue and immunoblot analysis.

519

#### 520 ***In vitro* transcription assays**

521 The cDNA of HeLa cells was used as a template for PCR amplification of each  
522 segment of IRF3, which were then used as templates for *in vitro* transcription  
523 following the manufacturer's instructions (Invitrogen, 00612295). All 5' primers of  
524 the segments contained the T7 promoter sequence (TAATACGACTCACTATAGGG).  
525 The transcription reaction was performed at 30 °C for 16 h. The transcribed RNA was  
526 precipitated and identified by agarose gel electrophoresis.

527

#### 528 ***In vitro* methylation assays**

529 Reaction mixtures (50 µL) containing 0.2 nM recombinant GST-tagged NSUN2, 0.01  
530 nM *in vitro* transcribed fragments of mRNA, 1 µCi of S-adenosyl [methyl-<sup>3</sup>H]  
531 methionine (0.5 µCi/µl ; PerkinElmer) in reaction buffer (500 mM Tris–HCl (pH 7.5),  
532 5 mM EDTA, 10 mM dithiothreitol, 20 mM MgCl<sub>2</sub>) and 40 units of RNase inhibitor  
533 were incubated for 60 min at 37 °C, as described (20). The <sup>3</sup>H-labeled products were  
534 isolated using DEAE-Sephadex A-50 columns and quantitated by liquid scintillation  
535 counting (PerkinElmer). Non-isotopic methylated RNA fragments were prepared  
536 using cold SAM (Biolabs, 0991410) and *in vitro* transcribed RNA fragments under  
537 similar conditions.

538

#### 539 **Reporter gene assays**

540 Cells were seeded into 24-well plates ( $2 \times 10^5$  cells per well) and transfected with 100

541 ng of luciferase reporter plasmid together with a total of 0.5  $\mu$ g of expression plasmid  
542 or empty control plasmid via Lipofectamine 2000 or Neofect. Twenty nanograms of  
543 pRL-TK *Renilla* luciferase reporter plasmid was also transfected to normalize the  
544 transfection efficiency. For the knockdown system, siRNAs were first transfected by  
545 Pepmute, and 24 hours later, luciferase reporter plasmid and pRL-TK *Renilla*  
546 luciferase reporter were subsequently transfected by Lipofectamine 2000. Luciferase  
547 activity in total cell lysates was measured using a dual-luciferase reporter assay  
548 system (Promega).

549

#### 550 **VSV plaque assay**

551 Vero cells were seeded into 24-well plates to about 80%–90% density before infection.  
552 The supernatants containing VSV then were serially diluted for infection of Vero cells.  
553 Two hours later, supernatants were removed, and PBS was used to wash the infected  
554 Vero cells. The DMEM containing 2% methylcellulose and 10% FBS was overlaid  
555 onto the cells. Two days later, cells were fixed and stained with formaldehyde (4%)  
556 and crystal violet (0.2%) for 6 h followed by washing with water. Finally, plaques  
557 were counted, and the results were averaged and multiplied by the dilution factor for  
558 calculation of viral titers as PFU/mL and statistical analyses were performed.

559

#### 560 **Endogenous *IRF3* mRNA pull down**

561 The four *IRF3* CHIRP probes were as follows: CTTTATCATTCTTTGGGTAACA,  
562 AACTCGTAGATTTTATGTGGGT, AGATGGTCTGCTGGAAGACTTG, and  
563 AGGAACCAGTTTATTGGTTGAG. All the probes were 3'biotin-TEG-modified  
564 (Sangon company). Ten  $\times$  10 cm dishes of cells were used for total RNA extraction  
565 for each group. The total RNA was dissolved in 600  $\mu$ L hybrid buffer (350 mM NaCl,  
566 0.5% SDS, 25 mM Tris-HCl, 1 mM EDTA, 7.5% formamide, pH 7.5), and 5  $\mu$ L  
567 *IRF3* probes (100  $\mu$ M) were added and incubated at 65  $^{\circ}$ C for 5 min followed by 37  $^{\circ}$ C  
568 while rotating for 2 hours. Then, 100  $\mu$ L Dynabeads M-280 streptavidin  
569 (ThermoFisher, 11205D) was added followed by rotating at 37  $^{\circ}$ C for 1 h. Six hundred  
570 microliters of wash buffer (2 $\times$  SSC buffer, 0.5% SDS, RNase inhibitor) was used to

571 wash the beads 5 times for 5 min at 4 °C. RNase-free water (20 µL) was added for  
572 elution followed by incubation at 75 °C for 5 min. After centrifuging at 1000g for 3  
573 min, the pulled down RNA was got in the eluate supernatant.

574

#### 575 **m<sup>5</sup>C Dot blot analysis**

576 Equal amounts mRNA were denatured at 65 °C for 10 min followed by immediate  
577 chilling on ice. mRNA was mixed with RNA loading buffer and then carefully spotted  
578 onto a Hybond-N+ membrane (GE Healthcare), followed by UV crosslinking. The  
579 membranes were washed with TBST 2 times and blocked with 5% BSA in TBST for  
580 2 hours. The anti-m<sup>5</sup>C antibody (Abcam, ab10805) was diluted 1:500 and incubated  
581 with the membranes at 4 °C overnight. Membranes were washed 3 times with TBST  
582 for 10 min and then incubated with goat anti-mouse IgG-HRP for 1 hour at room  
583 temperature. Membranes were washed 3 times with TBST for 5 min followed by  
584 chemiluminescence. Equal RNA loading was verified by methylene blue (MB)  
585 staining.

586

#### 587 **m<sup>5</sup>C-Methylated RNA immunoprecipitation (MeRIP)**

588 For MeRIP, 200 µg of total RNA was incubated with anti-m<sup>5</sup>C antibody in 800 µL of  
589 IPP buffer (150 mM NaCl, 0.1% NP-40, 10 mM Tris-HCl, pH 7.4) for 2 h at 4 °C.  
590 The mixture was then incubated with 30 µL proteinA/G beads overnight. The beads  
591 were then washed 5 times with IPP buffer, followed by RNA extraction and qPCR  
592 analysis.

593

#### 594 **Bisulfite RNA sequencing**

595 The adaptor sequences used were Adaptor-F: AGGTCTGGCTGAAGTTGA;  
596 Adaptor-R: ATACCTCCGTGACCATTT. The sequencing primers were  
597 Adaptor-F-mut: AGGTTTGGTTGAAGTTGA; Adaptor-R-mut:  
598 ATACCTCCATAACCATTT. Bisulfite RNA sequencing was performed to identify  
599 the m<sup>5</sup>C methylation site within an RNA fragment as previously described (48, 49).  
600 Briefly, 10 µg in vitro methylated RNA fragment (methylated by NSUN2 using cold

601 SAM or unmethylated) was dissolved in 10  $\mu$ L of RNase-free water and denatured at  
602 65 °C for 10 min followed by immediate chilling on ice. Samples were then mixed  
603 with 42.5  $\mu$ L of 5 M sodium bisulfite mix (Epitect) and 17.5  $\mu$ L DNA protection  
604 buffer (Epitect) and incubated at 70 °C for 5 min then 60 °C for 1 hour, and this  
605 process was repeated for 4 cycles, followed by desalting using Micro Bio-spin 6  
606 Chromatography Columns (Biorad, 732-6200). Then, the RNA adducts were  
607 desulfonated by adding 1 volume of Tris-HCl (pH 9.0) at 37 °C for 1 h. Next, 0.3 M  
608 sodium acetate (pH 5.2), 20  $\mu$ g glycogen (Beyotime, D0812) and 3 volumes of 100%  
609 ethanol were added for precipitation. The RNA was precipitated at -80 °C for at least  
610 5 h and then centrifuged. The bisulfite-converted RNA was reverse-transcribed using  
611 Adaptor-R-mut primer and random primer and subjected to PCR with Es Taq DNA  
612 polymerase (CW0688S) using Adaptor-mut primer pairs. The PCR products were  
613 inserted into the pGEM-T Easy Vector System (Promega, A1360) following the  
614 manufacturer's instructions. The plasmids purified from single clones were sequenced  
615 by T7 promoter. The sequencing results were checked by alignment with the  
616 corresponding original *IRF3* mRNA sequence, and the retained cytosines (C) were  
617 considered to be methylated by NSUN2. The unmethylated cytosines (C) were  
618 converted to uracils (U) on RNA segments.

619

### 620 **Lentiviral Package and Infection**

621 A lentiviral system was utilized to obtain NSUN2 knockout cells or stable cell lines in  
622 *Irf3<sup>-/-</sup>Irf7<sup>-/-</sup>* MEFs. For this, lentiviral backbone (2  $\mu$ g), psPAX2 (1  $\mu$ g), and  
623 pMD2.G (1  $\mu$ g) were transiently transfected into HEK293T cells which were plated  
624 on 6-well plates. Forty-eight hours later, supernatants were collected and filtered using  
625 a 0.45  $\mu$ m filter to infect target cells with polybrene (8  $\mu$ g/mL). Cells were infected  
626 twice to get a higher transduction efficiency. Then, puromycin was used to screen  
627 positive cells.

628

### 629 **Construction of knockout cell line by CRISPR/Cas9**

630 The gRNAs were NSUN2-gRNA-1: F-CACCGACGCGGAGGATGGCGCCGA and



631 R-AAACTCGGCGCCATCCTCCGCGTC; NSUN2-gRNA-2: F-CACCACCGTG  
632 GCGTTTCAGCGGTT and R-AAACAACCGCTGAAACGCCACGGT. The gRNAs  
633 were constructed in lentiCRISPR-v2 plasmid (Addgene). The lentiviral package and  
634 infection were the same as above, followed by seeding into 96-well plates (1 cell per  
635 well). After two weeks' cultivation, single clones were selected following enlarged  
636 cultivation with puromycin selection. Single clones were identified by immunoblot  
637 analysis, and genomic DNA was extracted followed by PCR and sequencing.

638

### 639 **Ethics statement**

640 This study was approved by the Ethics Committee of the Zhongnan Hospital of  
641 Wuhan University. The RNA-seq analyses of BALF samples were performed on  
642 existing samples collected during standard diagnostic tests, posing no extra burden to  
643 patients.

644

### 645 **Acknowledgement**

646 We thank Yingle Liu and Mang Shi for providing BALF samples of COVID-19  
647 patients. We thank Dr. Zheng-Li Shi for providing SARS-CoV-2, Dr. Hong-Bing Shu  
648 for providing SeV, HSV-1, VSV-GFP, Dr. Bo Zhang for providing ZIKV, and Dr.  
649 Ming-Zhou Chen for providing VSV. This study was supported by grants from the  
650 National Science and Technology Major Project (2018YFA0900801), China NSFC  
651 projects (32041007 and 81672008), Hubei Natural Science Foundation  
652 (2018CFA035), Basic Scientific Research Foundation of Central Universities  
653 (2042019gf0026) and Special Fund for COVID-19 Research of Wuhan University. We  
654 are grateful to Beijing Taikang Yicai Foundation for their great support to this work.

655

### 656 **Author contributions**

657 Y.C. and H.W. conceived the research and experiments. H.W., C.Z., L.Z., J.F. and  
658 M.H. performed the major experiments and analysis. Y.Z., K.L. and D.W. analyzed  
659 transcriptome sequencing data. C.F., H.T. and A.J. provided critical advice. H.W. and  
660 Y.C. wrote the manuscript with contributions from all other authors.

661

662 **Competing interests**

663 The authors declare no competing interests.

664

## 665 References

- 666 1. Roundtree IA, Evans ME, Pan T, & He C (2017) Dynamic RNA Modifications in Gene Expression  
667 Regulation. *Cell* 169(7):1187-1200.
- 668 2. Dezi V, Ivanov C, Haussmann IU, & Soller M (2016) Nucleotide modifications in messenger  
669 RNA and their role in development and disease. *Biochem Soc Trans* 44(5):1385-1393.
- 670 3. Trixl L & Lusser A (2019) The dynamic RNA modification 5-methylcytosine and its emerging  
671 role as an epitranscriptomic mark. *Wiley Interdiscip Rev RNA* 10(1):e1510.
- 672 4. Chellamuthu A & Gray SG (2020) The RNA Methyltransferase NSUN2 and Its Potential Roles in  
673 Cancer. *Cells* 9(8).
- 674 5. Yang Y, Hsu PJ, Chen YS, & Yang YG (2018) Dynamic transcriptomic m(6)A decoration: writers,  
675 erasers, readers and functions in RNA metabolism. *Cell Res* 28(6):616-624.
- 676 6. Cao G, Li HB, Yin Z, & Flavell RA (2016) Recent advances in dynamic m6A RNA modification.  
677 *Open Biol* 6(4):160003.
- 678 7. Yang J, Wang H, & Zhang W (2019) Regulation of Virus Replication and T Cell Homeostasis by  
679 N(6)-Methyladenosine. *Virology* 534(1):22-29.
- 680 8. Han D, *et al.* (2019) Anti-tumour immunity controlled through mRNA m(6)A methylation and  
681 YTHDF1 in dendritic cells. *Nature* 566(7743):270-274.
- 682 9. Frye M, Harada BT, Behm M, & He C (2018) RNA modifications modulate gene expression  
683 during development. *Science* 361(6409):1346-1349.
- 684 10. Winkler R, *et al.* (2019) m6A modification controls the innate immune response to infection  
685 by targeting type I interferons (vol 20, pg 173, 2018). *Nature Immunology* 20(2):243-243.
- 686 11. Rubio RM, Depledge DP, Bianco C, Thompson L, & Mohr I (2018) RNA m(6) A modification  
687 enzymes shape innate responses to DNA by regulating interferon beta. *Genes Dev*  
688 32(23-24):1472-1484.
- 689 12. Liu Y, *et al.* (2019) N6-methyladenosine RNA modification-mediated cellular metabolism  
690 rewiring inhibits viral replication. *Science* 365(6458):1171-1176.
- 691 13. Zheng Q, Hou J, Zhou Y, Li Z, & Cao X (2017) The RNA helicase DDX46 inhibits innate immunity  
692 by entrapping m(6)A-demethylated antiviral transcripts in the nucleus. *Nat Immunol*  
693 18(10):1094-1103.
- 694 14. Wang L, Wen M, & Cao X (2019) Nuclear hnRNPA2B1 initiates and amplifies the innate  
695 immune response to DNA viruses. *Science* 365(6454):eaav0758.
- 696 15. Squires JE, *et al.* (2012) Widespread occurrence of 5-methylcytosine in human coding and  
697 non-coding RNA. *Nucleic Acids Res* 40(11):5023-5033.
- 698 16. Tuorto F, *et al.* (2012) RNA cytosine methylation by Dnmt2 and NSun2 promotes tRNA  
699 stability and protein synthesis. *Nat Struct Mol Biol* 19(9):900-905.
- 700 17. Zhang XT, *et al.* (2012) The tRNA methyltransferase NSun2 stabilizes p16(INK4) mRNA by  
701 methylating the 3'-untranslated region of p16. *Nature Communications* 3.
- 702 18. Mei L, *et al.* (2020) RNA methyltransferase NSUN2 promotes gastric cancer cell proliferation  
703 by repressing p57(Kip2) by an m(5)C-dependent manner. *Cell Death Dis* 11(4):270.
- 704 19. Tang H, *et al.* (2015) NSun2 delays replicative senescence by repressing p27 (KIP1) translation  
705 and elevating CDK1 translation. *Aging (Albany NY)* 7(12):1143-1158.
- 706 20. Li Q, *et al.* (2017) NSUN2-Mediated m5C Methylation and METTL3/METTL14-Mediated m6A  
707 Methylation Cooperatively Enhance p21 Translation. *J Cell Biochem* 118(9):2587-2598.

- 708 21. Schumann U, *et al.* (2020) Multiple links between 5-methylcytosine content of mRNA and  
709 translation. *BMC Biol* 18(1):40.
- 710 22. Yang X, *et al.* (2017) 5-methylcytosine promotes mRNA export-NSUN2 as the  
711 methyltransferase and ALYREF as an m(5)C reader. *Cell Research* 27(5):606-625.
- 712 23. Chen X, *et al.* (2019) 5-methylcytosine promotes pathogenesis of bladder cancer through  
713 stabilizing mRNAs. *Nat Cell Biol* 21(8):978-990.
- 714 24. Yang Y, *et al.* (2019) RNA 5-Methylcytosine Facilitates the Maternal-to-Zygotic Transition by  
715 Preventing Maternal mRNA Decay. *Mol Cell* 75(6):1188-1202 e1111.
- 716 25. Zou F, *et al.* (2020) Drosophila YBX1 homolog YPS promotes ovarian germ line stem cell  
717 development by preferentially recognizing 5-methylcytosine RNAs. *Proc Natl Acad Sci U S A*  
718 117(7):3603-3609.
- 719 26. Eckwahl M, *et al.* (2020) 5-Methylcytosine RNA Modifications Promote Retrovirus Replication  
720 in an ALYREF Reader Protein-Dependent Manner. *J Virol* 94(13).
- 721 27. Honda K, Takaoka A, & Taniguchi T (2006) Type I interferon [corrected] gene induction by the  
722 interferon regulatory factor family of transcription factors. *Immunity* 25(3):349-360.
- 723 28. Ablasser A & Hur S (2019) Regulation of cGAS- and RLR-mediated immunity to nucleic acids.  
724 *Nature Immunology* 21(1):17-29.
- 725 29. Fitzgerald KA & Kagan JC (2020) Toll-like Receptors and the Control of Immunity. *Cell*  
726 180(6):1044-1066.
- 727 30. Rehwinkel J & Gack MU (2020) RIG-I-like receptors: their regulation and roles in RNA sensing.  
728 *Nat Rev Immunol* 20(9):537-551.
- 729 31. Honda K & Taniguchi T (2006) IRFs: master regulators of signalling by Toll-like receptors and  
730 cytosolic pattern-recognition receptors. *Nat Rev Immunol* 6(9):644-658.
- 731 32. Wu J & Chen ZJ (2014) Innate immune sensing and signaling of cytosolic nucleic acids. *Annu*  
732 *Rev Immunol* 32:461-488.
- 733 33. Tamura T, Yanai H, Savitsky D, & Taniguchi T (2008) The IRF family transcription factors in  
734 immunity and oncogenesis. *Annu Rev Immunol* 26:535-584.
- 735 34. Schneider WM, Chevillotte MD, & Rice CM (2014) Interferon-stimulated genes: a complex  
736 web of host defenses. *Annu Rev Immunol* 32:513-545.
- 737 35. Li S, *et al.* (2016) The tumor suppressor PTEN has a critical role in antiviral innate immunity.  
738 *Nat Immunol* 17(3):241-249.
- 739 36. Mancino A & Natoli G (2016) Specificity and Function of IRF Family Transcription Factors:  
740 Insights from Genomics. *J Interferon Cytokine Res* 36(7):462-469.
- 741 37. Cao Y, *et al.* (2018) PTEN-L promotes type I interferon responses and antiviral immunity. *Cell*  
742 *Mol Immunol* 15(1):48-57.
- 743 38. Zhou Y, *et al.* (2019) Interferon-inducible cytoplasmic IncLrrc55-AS promotes antiviral innate  
744 responses by strengthening IRF3 phosphorylation. *Cell Res* 29(8):641-654.
- 745 39. Xiong Y, *et al.* (2020) Transcriptomic characteristics of bronchoalveolar lavage fluid and  
746 peripheral blood mononuclear cells in COVID-19 patients. *Emerg Microbes Infect*  
747 9(1):761-770.
- 748 40. Yuan S, *et al.* (2014) Methylation by NSun2 represses the levels and function of microRNA  
749 125b. *Molecular and cellular biology* 34(19):3630-3641.
- 750 41. Huai W, *et al.* (2019) KAT8 selectively inhibits antiviral immunity by acetylating IRF3. *J Exp*  
751 *Med* 216(4):772-785.

- 752 42. Wang P, Zhao W, Zhao K, Zhang L, & Gao C (2015) TRIM26 negatively regulates  
753 interferon-beta production and antiviral response through polyubiquitination and  
754 degradation of nuclear IRF3. *PLoS Pathog* 11(3):e1004726.
- 755 43. Moon HJ & Redman KL (2014) Trm4 and Nsun2 RNA:m5C methyltransferases form  
756 metabolite-dependent, covalent adducts with previously methylated RNA. *Biochemistry*  
757 53(45):7132-7144.
- 758 44. Wang X, *et al.* (2014) N6-methyladenosine-dependent regulation of messenger RNA stability.  
759 *Nature* 505(7481):117-120.
- 760 45. Shi H, *et al.* (2017) YTHDF3 facilitates translation and decay of  
761 N(6)-methyladenosine-modified RNA. *Cell Res* 27(3):315-328.
- 762 46. Wang X, *et al.* (2015) N(6)-methyladenosine Modulates Messenger RNA Translation Efficiency.  
763 *Cell* 161(6):1388-1399.
- 764 47. Xiao W, *et al.* (2016) Nuclear m(6)A Reader YTHDC1 Regulates mRNA Splicing. *Mol Cell*  
765 61(4):507-519.
- 766 48. Pollex T, Hanna K, & Schaefer M (2010) Detection of cytosine methylation in RNA using  
767 bisulfite sequencing. *Cold Spring Harb Protoc* 2010(10):pdb prot5505.
- 768 49. Schaefer M, Pollex T, Hanna K, & Lyko F (2009) RNA cytosine methylation analysis by bisulfite  
769 sequencing. *Nucleic Acids Res* 37(2):e12.
- 770
- 771

772 **Figure legends**

773 **Figure 1. NSUN2 negatively regulates antiviral innate type I interferon**  
774 **responses.**

775 (a) qPCR analysis of *IFNB* mRNA in HEK293T cells transfected with siControl or  
776 siRNAs targeting different RNA methyltransferases or demethylases for 36 h, with or  
777 without infection by SeV for another 8 h. (b) Dual-luciferase assay analyzing IFN- $\beta$   
778 promoter activity (IFN- $\beta$ -Luc) in HEK293T cells in 24-well plates transfected for 24  
779 h with 100 ng IFN- $\beta$ -Luc plasmid and 20 ng *Renilla* luciferase plasmid (RL-TK)  
780 along with vector or increasing amounts (0, 0.1, 0.2, and 0.5  $\mu$ g) of plasmid encoding  
781 NSUN2, with or without infection by SeV, for another 10 h. (c) Dual-luciferase  
782 analysis of IFN- $\beta$ -Luc in HEK293T cells in 24-well plates transfected for 24 h with  
783 vector (Vec) or NSUN2, with or without infection by SeV or VSV for another 10 h, or  
784 transfected with poly (I:C) (1  $\mu$ g/mL) for another 10 h. (d) qPCR analysis of *IFNB*,  
785 *ISG15*, *CXCL10* and *NSUN2* mRNA in HEK293T cells transfected with siControl or  
786 siRNAs targeting NSUN2, with or without infection by SeV for 8 h. Immunoblot  
787 analysis shows knockdown efficiency of siRNAs targeting NSUN2. (e) qPCR analysis  
788 of *IFNB*, *ISG15* and *CXCL10* mRNA in wild-type HEK293T cells or *NSUN2*<sup>-/-</sup>  
789 HEK293T cells, with or without infection by SeV for 8 h. (f) qPCR analysis of *VSV-G*  
790 RNA and VSV plaque assay in wild-type HEK293T cells or *NSUN2*<sup>-/-</sup> HEK293T  
791 cells with infection by VSV-GFP for 24 h (MOI = 0.005). (g) Microscopy analysis of  
792 VSV-GFP replication in wild-type HEK293T cells or *NSUN2*<sup>-/-</sup> HEK293T cells, both  
793 infected with VSV-GFP for 24 h (MOI = 0.005). (h) qPCR analysis of *VSV-G* RNA in  
794 wild-type HEK293T cells or *NSUN2*<sup>-/-</sup> HEK293T cells with infection by VSV-GFP  
795 for 24 h (MOI = 0.005), with or without ruxolitinib treatment. (i) qPCR analysis of  
796 *Nsun2* mRNA in bone-marrow-derived dendritic cells (BMDCs) from 8-week-old  
797 wild-type C57BL/6 mice with infection by SeV, HSV-1, VSV, or ZIKV for 0, 24, 48,  
798 and 72 h. (j) qPCR analysis of *NSUN2* mRNA in Caco-2 cells with infection by  
799 SARS-CoV-2 for 0, 4, 12, and 24 h (MOI = 0.1). (k) RNA-seq signals for *NSUN2* in  
800 bronchoalveolar lavage fluid (BALF) of COVID-19 patients (Patient1, Patient2) and

801 healthy controls (Ctrl1, Ctrl2, Ctrl3). Total RNA was extracted and analyzed by  
802 RNA-seq to identify differentially expressed genes implicated in COVID-19 disease  
803 pathogenesis. The scale on the y-axis indicates the read density per million of total  
804 normalized reads. Data are representative of three independent experiments and were  
805 analyzed by two-tailed unpaired t test. Graphs show the mean  $\pm$  SD (n = 3) derived  
806 from three independent experiments. NS, not significant for  $P > 0.05$ ,  $*P < 0.05$ ,  $**P$   
807  $< 0.01$ ,  $***P < 0.001$ .

808

809 **Figure 2. NSUN2 inhibits the expression level of IRF3.**

810 (a) Dual-luciferase assay analyzing a luciferase reporter plasmid for the  
811 IRF3-responsive promoter containing positive regulatory domains III and I of the  
812 IFN- $\beta$  promoter (PRDIII-I-Luc) in HEK293T cells in 24-well plates transfected for 36  
813 h with the RIG-N, MDA5-N, MAVS, TBK1, and IRF3-5D expression plasmids, as  
814 indicated, with co-transfection with empty vector or NSUN2. (b) Dual-luciferase  
815 analysis of PRDIII-I-Luc in HEK293T cells in 24-well plates transfected for 36 h with  
816 the indicated RIG-N, MDA5-N, MAVS, TBK1, and IRF3-5D expression plasmids  
817 with co-transfection with siControl or siNSUN2-1. (c) Immunoblot analysis in  
818 HEK293T cells transfected with vector or NSUN2 for 36 h, with or without infection  
819 by SeV for another 12 h. (d) Immunoblot analysis in wild-type HEK293T cells or  
820 *NSUN2*<sup>-/-</sup> HEK293T cells with or without infection by SeV for 12 h. (e) Immunoblot  
821 analysis in wild-type A549 cells or *NSUN2*<sup>-/-</sup> A549 cells with infection by SeV for 0,  
822 4, 8, and 12 h. (f) Immunoblot analysis in wild-type HEK293T cells or *NSUN2*<sup>-/-</sup>  
823 HEK293T cells, with infection by SeV for 0, 4, 8, and 12 h. (g) Immunofluorescence  
824 microscopy of HEK293T cells transfected with IRF3-CDS-EGFP along with vector or  
825 NSUN2 for 36 h. Data are representative of three independent experiments and were  
826 analyzed by two-tailed unpaired t test. Graphs show the mean  $\pm$  SD (n = 3) derived  
827 from three independent experiments. NS, not significant for  $P > 0.05$ ,  $*P < 0.05$ ,  $**P$   
828  $< 0.01$ ,  $***P < 0.001$ .

829

830 **Figure 3. NSUN2 interacts with IRF3 mRNA and induces its degradation.**

831 (a) Coimmunoprecipitation (IP) and immunoblot (IB) analysis of HEK293T cells  
832 transfected with plasmids encoding HA-NSUN2 and Flag-IRF3. (b)  
833 Immunoprecipitation by HA-Tag-conjugated beads and immunoblot analysis of  
834 HEK293T cells transfected with plasmids encoding HA-NSUN2, with SeV infection  
835 for 8 h, followed by RNA extraction and qPCR analysis of combined *IRF3* mRNA. (c)  
836 qPCR analysis of *IRF3* mRNA and *TBK1* mRNA in HEK293T cells transfected with  
837 siControl or siRNAs targeting NSUN2, with or without infection by SeV, for 8 h. (d)  
838 qPCR analysis of *IRF3* mRNA and *TBK1* mRNA in wild-type HEK293T cells or  
839 *NSUN2*<sup>-/-</sup> HEK293T cells, with or without infection by SeV for 8 h. (e) Stability  
840 analysis of *IRF3* mRNA and *TBK1* mRNA in wild-type HEK293T cells or *NSUN2*<sup>-/-</sup>  
841 HEK293T cells with treatment of actinomycin D (ActD) for 0, 6, 12, and 18 h. Data  
842 are representative of three independent experiments and were analyzed by two-tailed  
843 unpaired t test. Graphs show the mean ± SD (n = 3) derived from three independent  
844 experiments. NS, not significant for  $P > 0.05$ , \* $P < 0.05$ , \*\* $P < 0.01$ , \*\*\* $P < 0.001$ .

845

846 **Figure 4. NSUN2 catalyzes the formation of m<sup>5</sup>C methylation of *IRF3* mRNA**  
847 **both exogenously and endogenously.**

848 (a) Schematic diagram of the *IRF3* mRNA segments used for *in vitro* methylation  
849 assays and bisulfite RNA sequencing. (b) *In vitro* m<sup>5</sup>C methylation assays using  
850 recombinant GST-NSUN2 and the *in vitro* transcripts. (c) *In vitro* m<sup>5</sup>C methylation  
851 assays using recombinant GST-NSUN2 and the *in vitro* transcribed segments of *IRF3*  
852 mRNA depicted in Figure 4a. (d) m<sup>5</sup>C dot blot analysis of endogenous *IRF3* mRNA  
853 (200 ng) pulled down by IRF3 CHIRP probes in wild-type HEK293T cells or  
854 *NSUN2*<sup>-/-</sup> HEK293T cells with or without exogenous NSUN2 overexpression. Equal  
855 *IRF3* mRNAs were also loaded and verified by methylene blue (MB) staining. (e)  
856 MeRIP analysis of the m<sup>5</sup>C methylated *IRF3* mRNA immunoprecipitated by m<sup>5</sup>C  
857 antibody from wild-type HEK293T cells or *NSUN2*<sup>-/-</sup> HEK293T cells, with or  
858 without exogenous NSUN2 expression. *TBK1* was used as a negative control. (f)  
859 Wild-type HEK293T cells or *NSUN2*<sup>-/-</sup> HEK293T cells were transfected with  
860 pGL3.0-CMV-Luc or pGL3.0-CMV-*IRF3*-CDS-Luc or



861 pGL3.0-CMV-*IRF3*-5'UTR-Luc or pGL3.0-CMV-*IRF3*-3'UTR-Luc, together with  
862 *Renilla* luciferase (RL-TK). Forty-eight hours later, firefly luciferase activity against  
863 *Renilla* luciferase activity was analyzed. (g) In vitro m<sup>5</sup>C methylation assays using  
864 recombinant GST-NSUN2 and different mutant proteins. (h-i) Dual-luciferase assay  
865 analyzing IFN-β promoter activity in HEK293T cells (h) or *NSUN2*<sup>-/-</sup> HEK293T  
866 cells (i) in 24-well plates transfected for 24 h with 100 ng IFN-β firefly luciferase  
867 reporter (IFN-β-Luc) and 20 ng *Renilla* luciferase (RL-TK), along with 300 ng vector  
868 or plasmid encoding NSUN2 or different mutants, with or without infection by SeV,  
869 for another 10 h. (j) qPCR analysis of *IFNB* mRNA in *NSUN2*<sup>-/-</sup> HEK293T cells  
870 transfected for 24 h with NSUN2 or different mutants, with or without infection by  
871 SeV, for another 12 h. (k) m<sup>5</sup>C dot blot analysis of total RNA (1 μg) extracted from in  
872 *NSUN2*<sup>-/-</sup> HEK293T cells with exogenous NSUN2 expression or different mutants.  
873 Equal RNAs were also loaded and verified by methylene blue (MB) staining. Data are  
874 representative of three independent experiments and were analyzed by two-tailed  
875 unpaired t test. Graphs show the mean ± SD (n = 3) derived from three independent  
876 experiments. NS, not significant for  $P > 0.05$ , \* $P < 0.05$ , \*\* $P < 0.01$ , \*\*\* $P < 0.001$ .

877

878 **Figure 5. *IRF3* m<sup>5</sup>C methylation site mutation results in enhanced *IRF3***  
879 **expression and antiviral response.**

880 (a) Schematic depiction of *in vitro* bisulfite RNA sequencing to distinguish m<sup>5</sup>C  
881 (cytosine methylated by NSUN2) from C (cytosine not methylated). (b-c)  
882 Identification of m<sup>5</sup>C modification on all cytosines of *IRF3* mRNA. Data are  
883 expressed as the ratio of m<sup>5</sup>C to (C + m<sup>5</sup>C). (d) *In vitro* m<sup>5</sup>C methylation assays of the  
884 *IRF3* segments or the m<sup>5</sup>C methylated cytosines mutated segments using recombinant  
885 GST-NSUN2. (e) qPCR analysis of *IRF3* mRNA in *Irf3*<sup>-/-</sup>*Irf7*<sup>-/-</sup> MEFs transfected  
886 with plasmid encoding NSUN2 along with wild-type IRF3 full length (IRF3-FL-WT)  
887 or various cytosine-mutated IRF3-FLs for 48 h. (f) qPCR analysis of *Ifnb* mRNA in  
888 *Irf3*<sup>-/-</sup>*Irf7*<sup>-/-</sup> MEFs transfected with plasmid encoding NSUN2 along with  
889 IRF3-FL-WT or the m<sup>5</sup>C methylated cytosines mutated IRF3-FL, with stimulation by  
890 SeV, for 8 h. (g) qPCR analysis of *IRF3* mRNA in *Irf3*<sup>-/-</sup>*Irf7*<sup>-/-</sup> MEFs reconstituted

891 with IRF3-FL-WT or IRF3-FL-Mut (IRF3-FL with the four m<sup>5</sup>C methylated cytosines  
892 mutated) by lentiviral system transfected with plasmid encoding NSUN2 or empty  
893 vector (Vec). (h) Stability analysis of *IRF3* mRNA in *Irf3*<sup>-/-</sup>*Irf7*<sup>-/-</sup> MEFs reconstituted  
894 with IRF3-FL-WT or IRF3-FL-Mut by lentiviral system with treatment of  
895 actinomycin D (ActD) for 0, 4, 8, and 12 h. Data are representative of three  
896 independent experiments and analyzed by two-tailed unpaired t test. Graphs show the  
897 mean ± SD (n = 3) derived from three independent experiments. NS, not significant  
898 for  $P > 0.05$ , \* $P < 0.05$ , \*\* $P < 0.01$ , \*\*\* $P < 0.001$ .

899

900 **Figure 6. Pivotal role for NSUN2 in the induction of type I interferon and**  
901 **antiviral response *in vivo*.**

902 (a) qPCR analysis of *Nsun2* mRNA in BMDCs from *Nsun2*<sup>+/+</sup> mice or *Nsun2*<sup>+/-</sup> mice.  
903 (b) qPCR analysis of *Ifnb* mRNA in BMDCs from *Nsun2*<sup>+/+</sup> mice or *Nsun2*<sup>+/-</sup> mice,  
904 with or without infection by SeV for 8 and 12 h, HSV-1 for 3 and 6 h, or VSV for 6  
905 and 12 h. (c) qPCR analysis of *Isg15* and *Cxcl10* in BMDCs from *Nsun2*<sup>+/+</sup> mice or  
906 *Nsun2*<sup>+/-</sup> mice, with or without infection by SeV, HSV-1, or VSV. (d) ELISA of IFN-β  
907 and IFN-α in serum from 8-week-old *Nsun2*<sup>+/+</sup> mice (n = 5) and *Nsun2*<sup>+/-</sup> mice (n = 5)  
908 injected intraperitoneally for 16 h with VSV ( $4 \times 10^7$  PFU per mouse). Each symbol  
909 represents an individual mouse; small horizontal lines indicate the mean. (e) qPCR  
910 analysis of *Ifnb* mRNA and the corresponding *VSV-G* RNA in different organs from  
911 *Nsun2*<sup>+/+</sup> mice or *Nsun2*<sup>+/-</sup> mice, injected intraperitoneally for 16 h with VSV ( $4 \times$   
912  $10^7$  PFU per mouse). (f) Survival (Kaplan–Meier curve) of *Nsun2*<sup>+/+</sup> mice (n = 7) or  
913 *Nsun2*<sup>+/-</sup> mice (n = 7) infected intraperitoneally with a high dose of VSV ( $1 \times 10^8$   
914 PFU per mouse) and monitored for survival for 15 days. Data are representative of  
915 three independent experiments and were analyzed by two-tailed unpaired t test.  
916 Graphs show the mean ± SD (n = 3) derived from three independent experiments. NS,  
917 not significant for  $P > 0.05$ , \* $P < 0.05$ , \*\* $P < 0.01$ , \*\*\* $P < 0.001$ .

918

919 **Supplementary information**

920 **Supplementary Fig S1. Knockout of NSUN2 in A549 cells promotes IFN- $\beta$**   
921 **responses.**

922 (a) qPCR analysis of *IFNB* mRNA in wild-type A549 cells or NSUN2 knockout A549  
923 cells, with or without infection by SeV, for 8 h. (b-c) qPCR analysis of *IFNB* mRNA  
924 or *VSV-G* RNA in wild-type A549 cells or NSUN2 knockout A549 cells, with  
925 infection by VSV for 24 h (MOI = 0.005). (d) VSV plaque assay in in wild-type A549  
926 cells or NSUN2 knockout A549 cells, with infection by VSV for 24 h (MOI = 0.005).  
927 (e) Microscopy analysis of VSV-GFP replication in wild-type A549 cells or *NSUN2*<sup>-/-</sup>  
928 A549 cells, all infected with VSV-GFP for 18 h (MOI = 0.005). Data are  
929 representative of three independent experiments and analyzed by two-tailed unpaired t  
930 test. Graphs show the mean  $\pm$  SD (n = 3) derived from three independent experiments.  
931 NS, not significant for  $P > 0.05$ , \* $P < 0.05$ , \*\* $P < 0.01$ , \*\*\* $P < 0.001$ .

932

933 **Supplementary Fig S2. Knockout of NSUN2 in A549 cells elevated the**  
934 **endogenous *IRF3* mRNA level.**

935 (a-b) qPCR analysis of *IRF3* or *TBK1* mRNA in wild-type A549 cells or NSUN2  
936 knockout A549 cells, with or without infection by SeV, for 8 h.

937

938 **Supplementary Fig S3. Knockout of NSUN2 enhances *IRF3* mRNA stability in**  
939 **A549 cells.**

940 (a) Stability analysis of *IRF3* mRNA in wild-type A549 cells or *NSUN2*<sup>-/-</sup> A549 cells  
941 with treatment of actinomycin D (ActD) for 0, 3, 6, 9, and 12 h. Data are  
942 representative of three independent experiments and were analyzed by two-tailed  
943 unpaired t test. Graphs show the mean  $\pm$  SD (n = 3) derived from three independent  
944 experiments. NS, not significant for  $P > 0.05$ , \* $P < 0.05$ , \*\* $P < 0.01$ , \*\*\* $P < 0.001$ .

945

946 **Supplementary Fig S4. ALYREF negatively regulates IFN- $\beta$  response.**

947 (a) Dual-luciferase analysis of IFN- $\beta$ -Luc activity in HEK293T cells in 24-well plates  
948 transfected for 24 h with 100 ng IFN- $\beta$  firefly luciferase reporter (IFN- $\beta$ -Luc) and 20

949 ng *Renilla* luciferase (RL-TK), along with vector or the plasmid encoding ALYREF,  
950 with or without infection by SeV, for another 10 h. (b) Dual-luciferase analysis of  
951 PRDIII-I-Luc activity in HEK293T cells in 24-well plates transfected for 24 h with  
952 the indicated RIG-N, MAVS, TBK1, and IRF3-5D expression plasmids with  
953 co-transfection with vector or ALYREF. Data are representative of three independent  
954 experiments and were analyzed by two-tailed unpaired t test. Graphs show the mean  $\pm$   
955 SD (n = 3) derived from three independent experiments. NS, not significant for  $P >$   
956 0.05, \* $P < 0.05$ , \*\* $P < 0.01$ , \*\*\* $P < 0.001$ .

957

958 **Supplementary Fig S5. Bisulfite sequencing alignment of IRF3 segments.**

959 (a-d) The *in vitro*transcribed IRF3 segments were subjected to NSUN2 methylation  
960 and bisulfite RNA sequencing. The sequence on the top was the original template, and  
961 the lower sequences were the identified segments. The retained cytosines (C) were  
962 considered to be methylated by NSUN2, while the unmethylated cytosines (C) were  
963 converted to uracils (U) which then converted to thymines (T) after PCR. The ratio of  
964 m<sup>5</sup>C to (C + m<sup>5</sup>C) represents the methylation rate.

# Figure 1

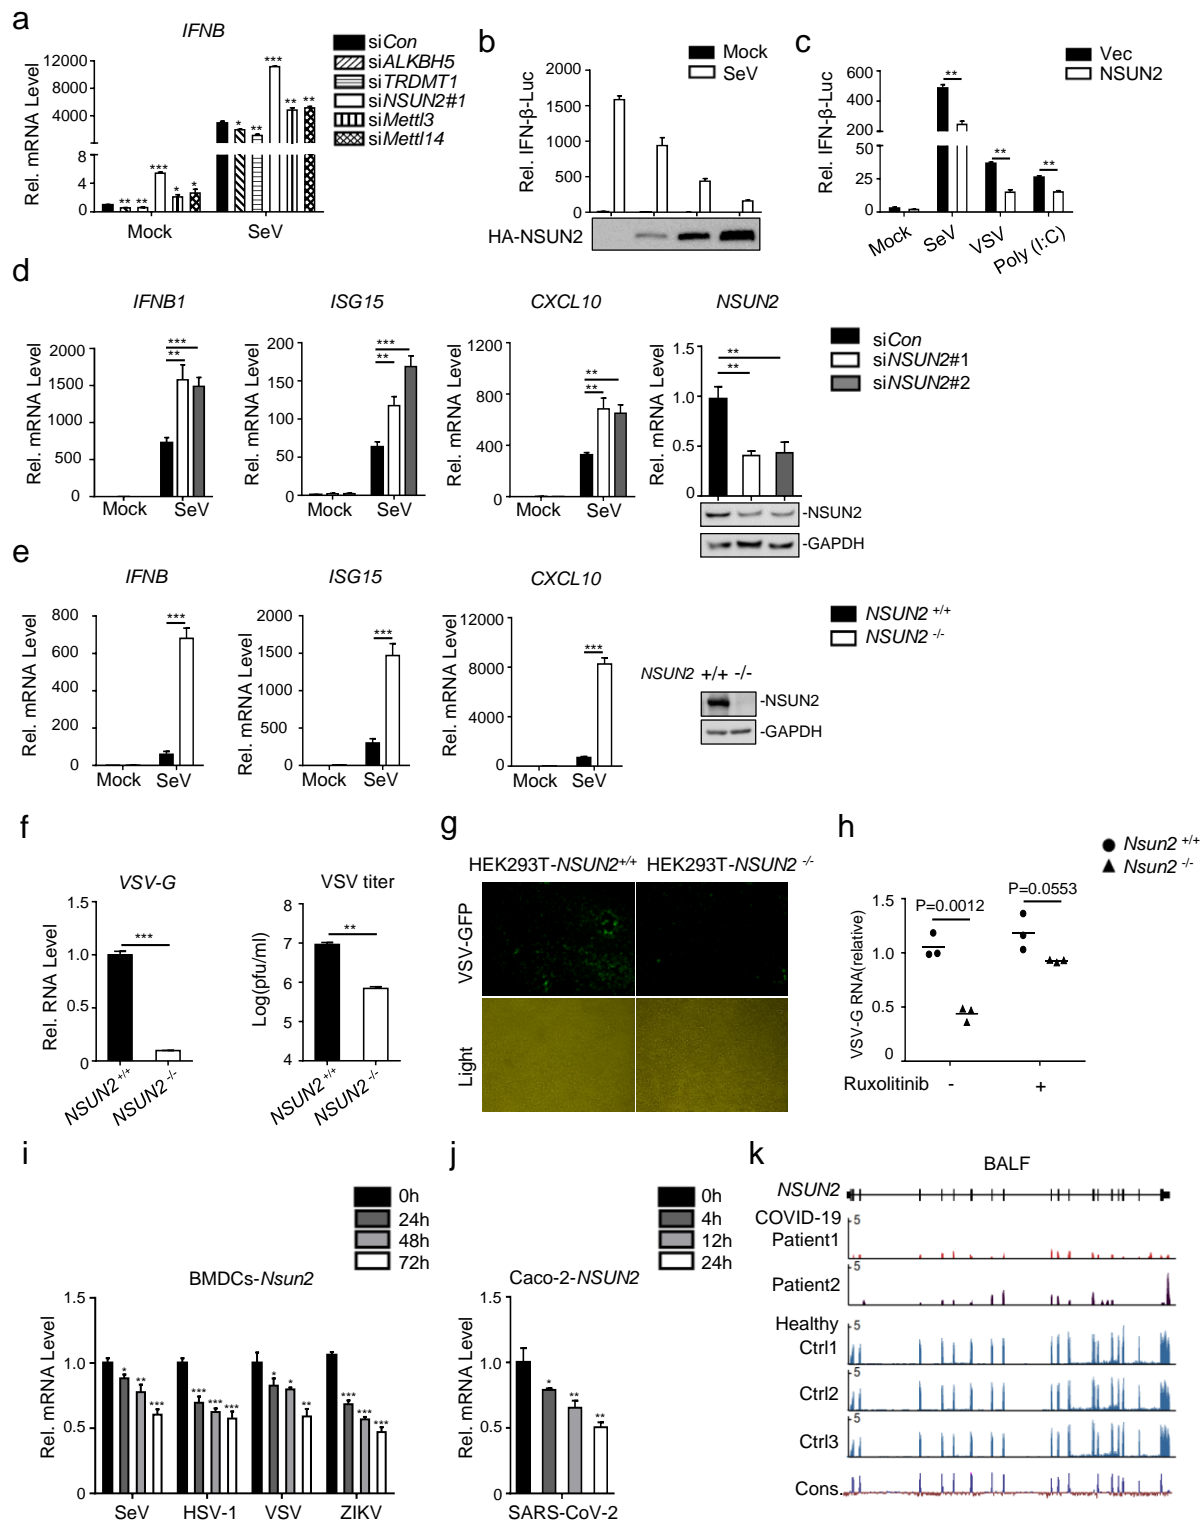

Figure 2

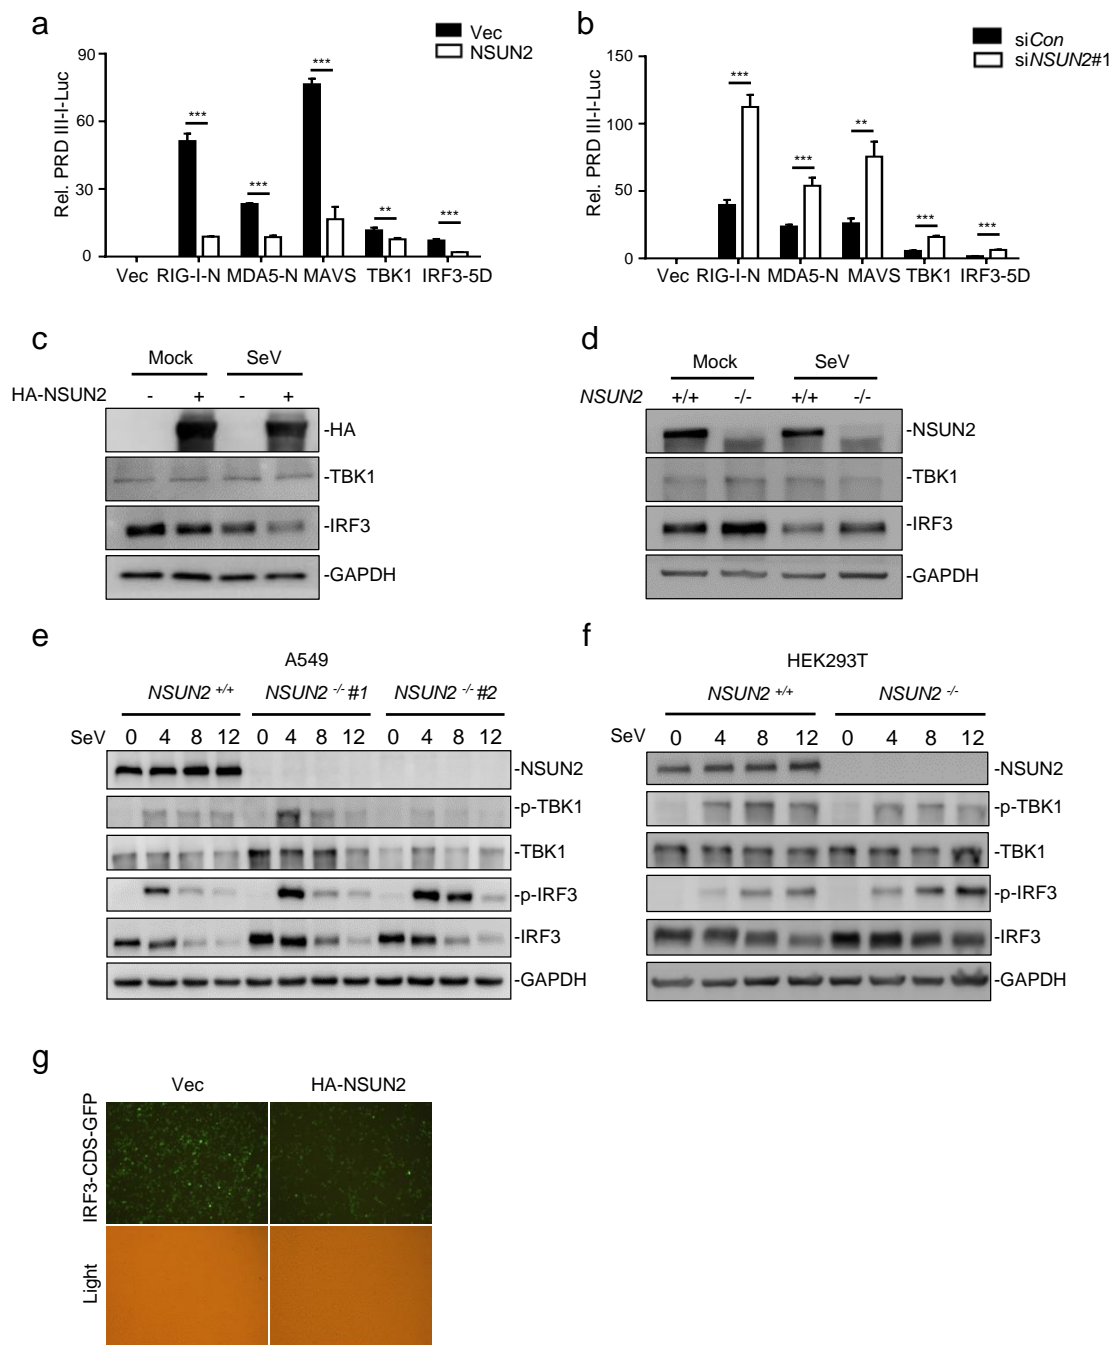

Figure 3

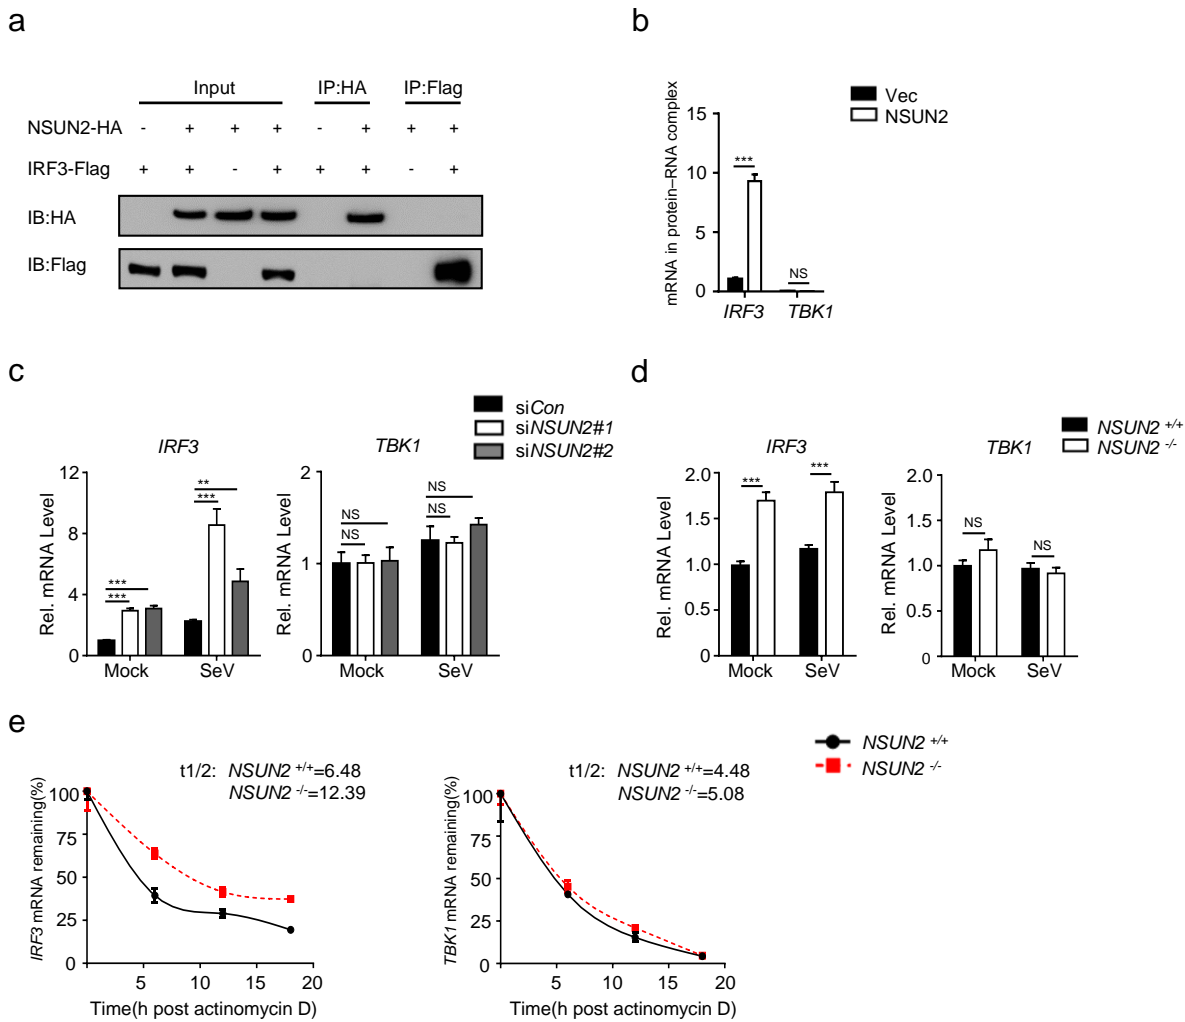

# Figure 4

a

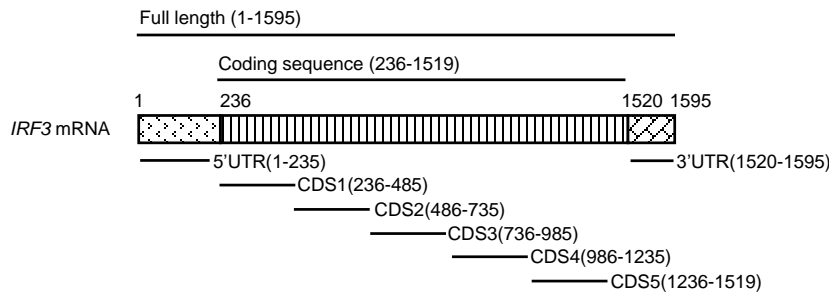

b

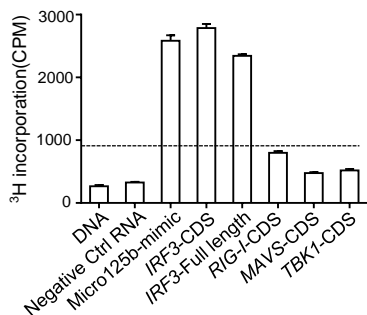

c

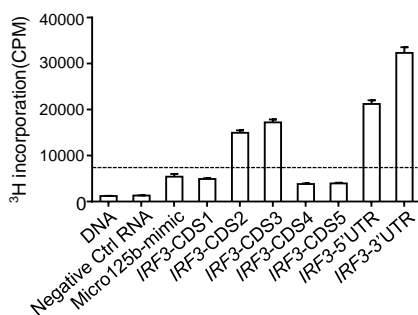

f

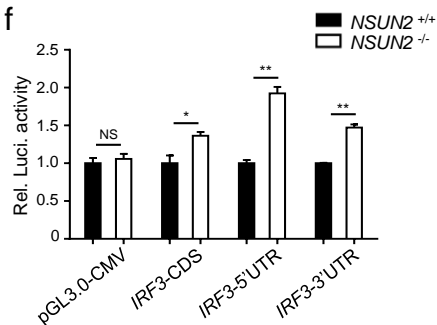

d

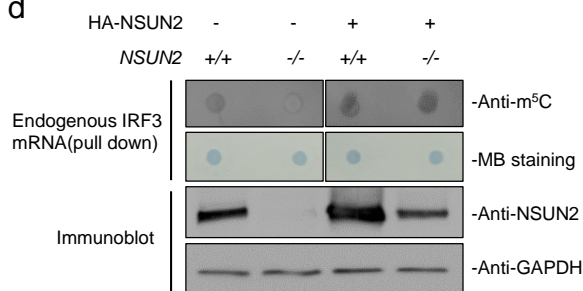

e

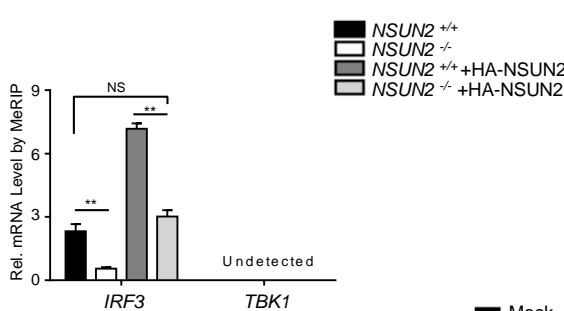

g

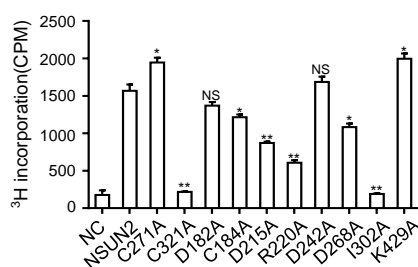

h

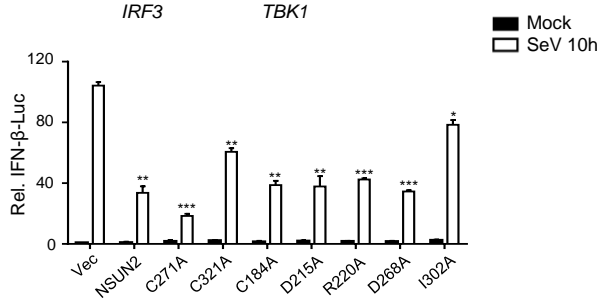

i

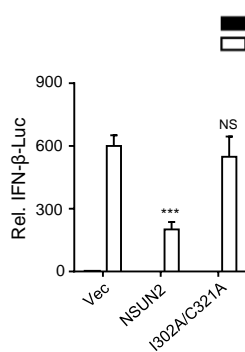

j

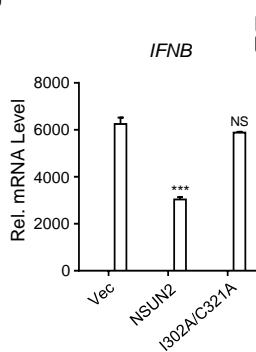

k

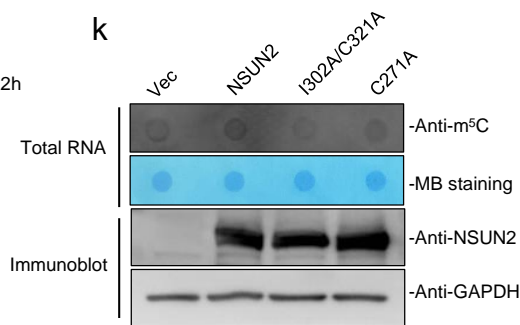



## Figure 5

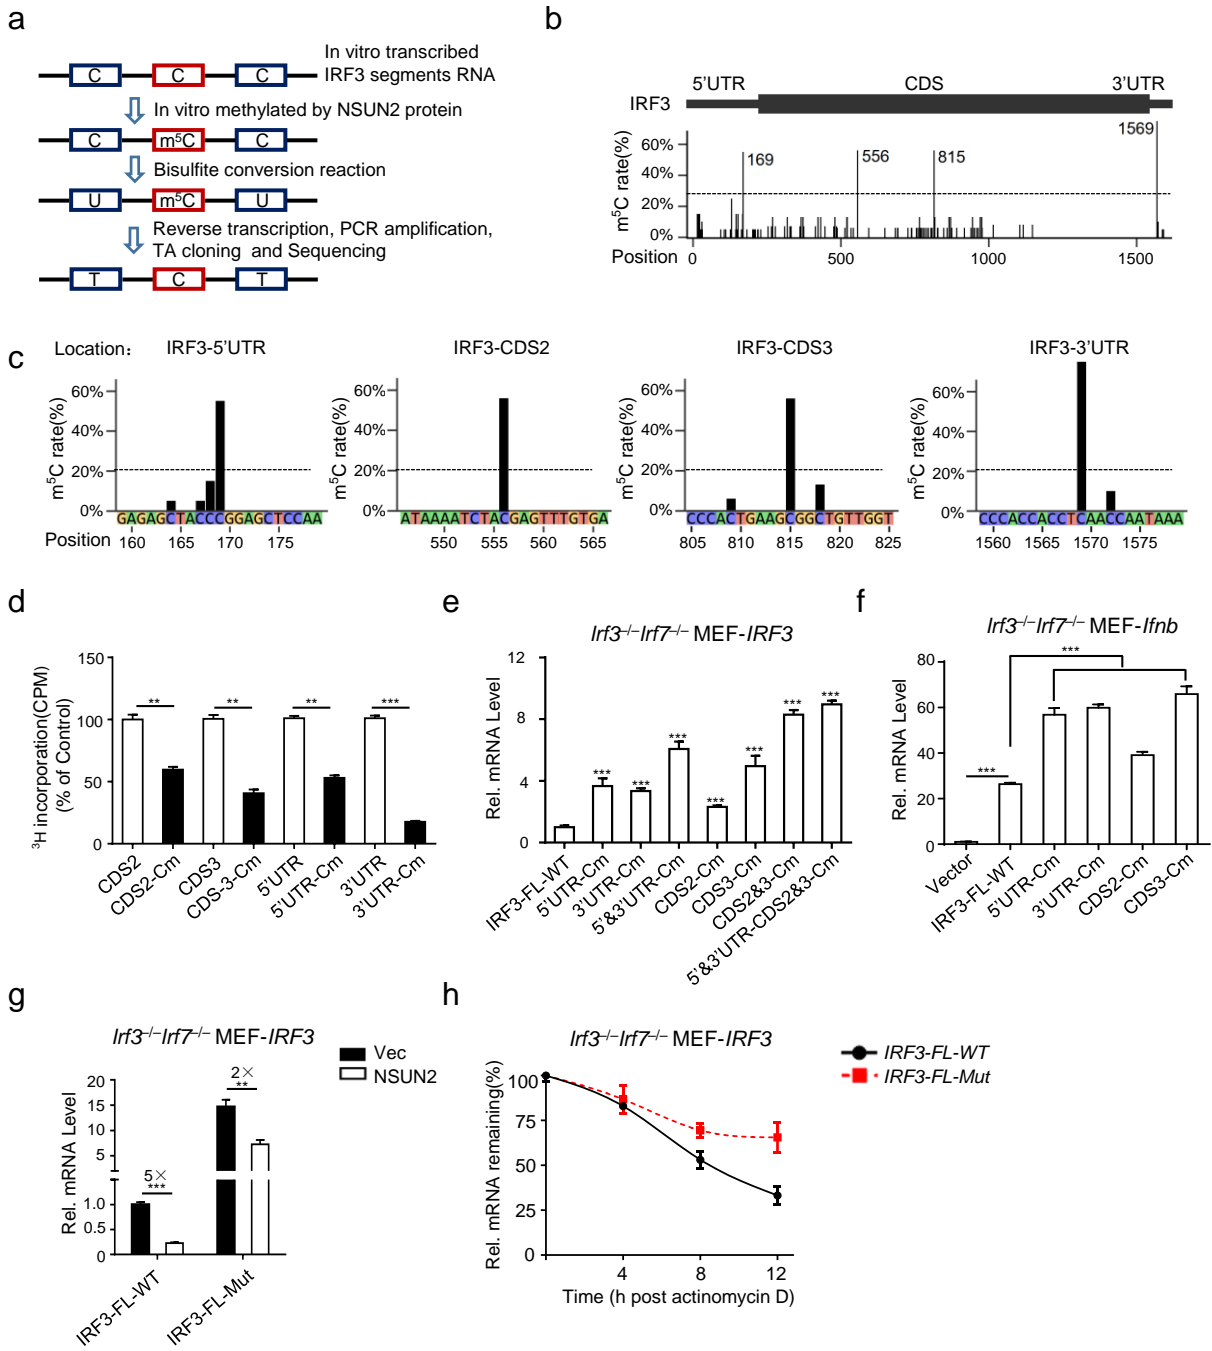

Figure 6

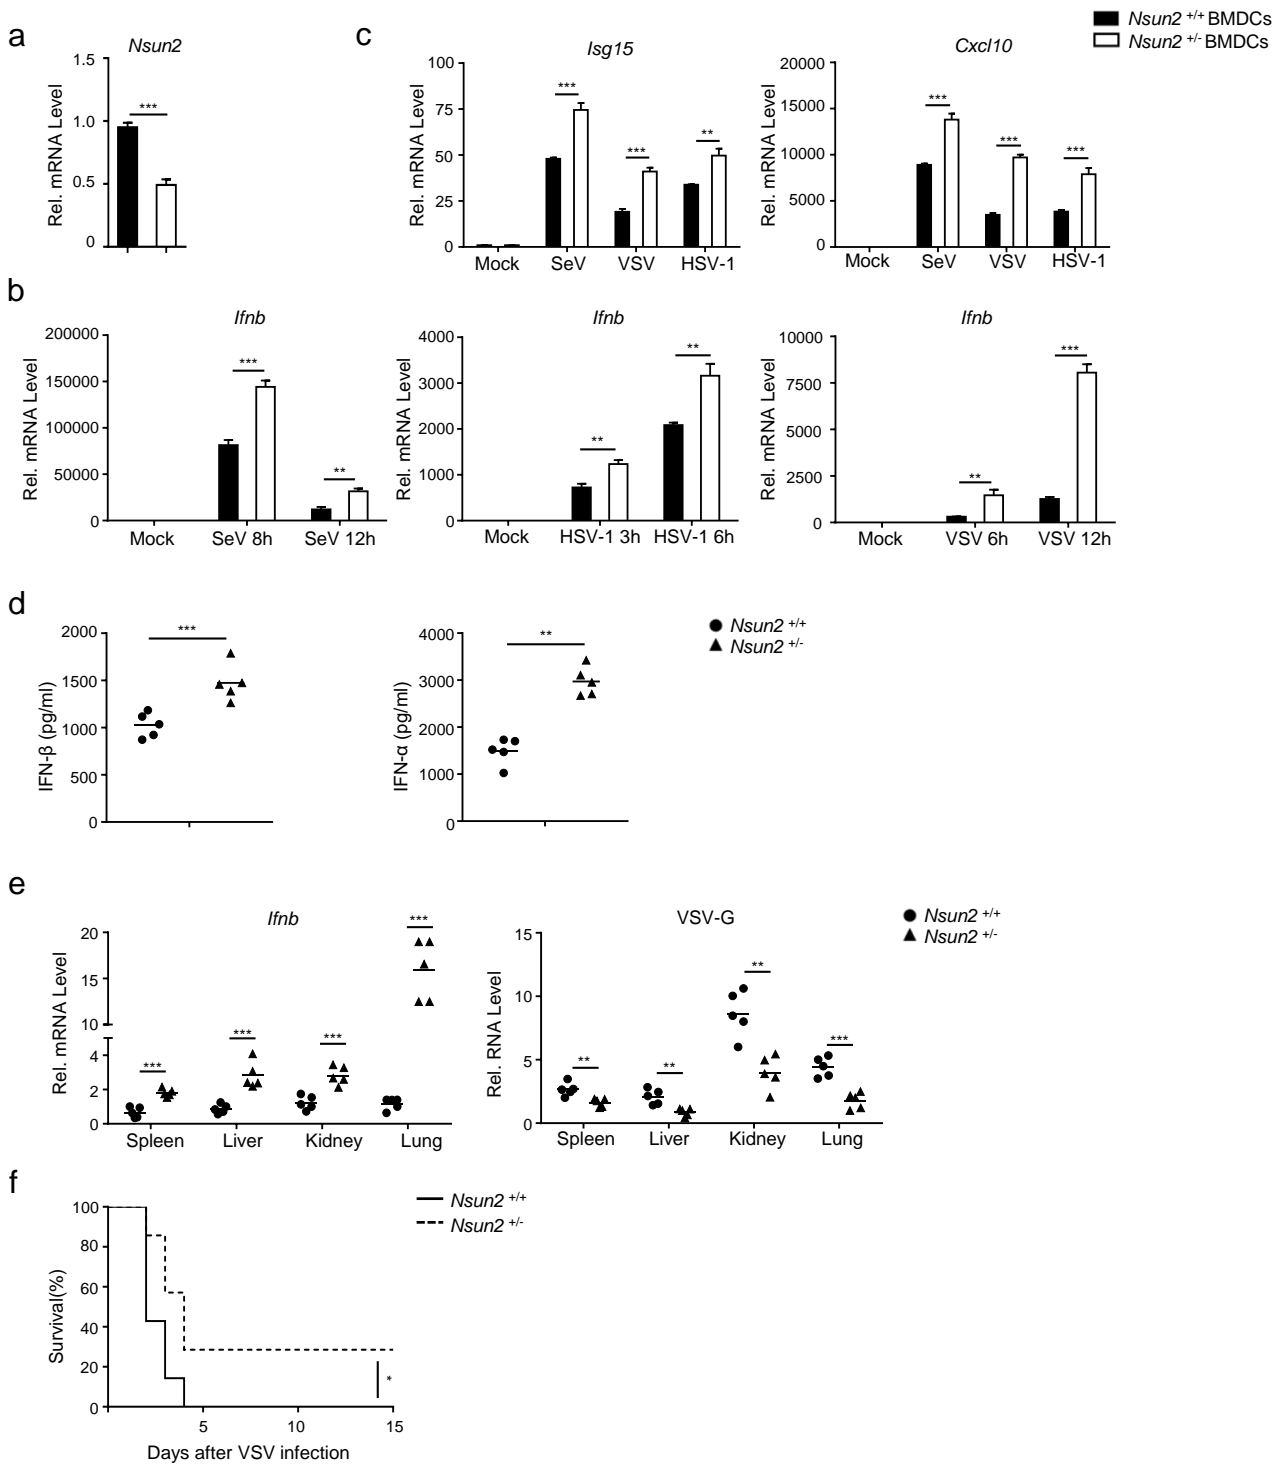

## Supplementary Figure S1

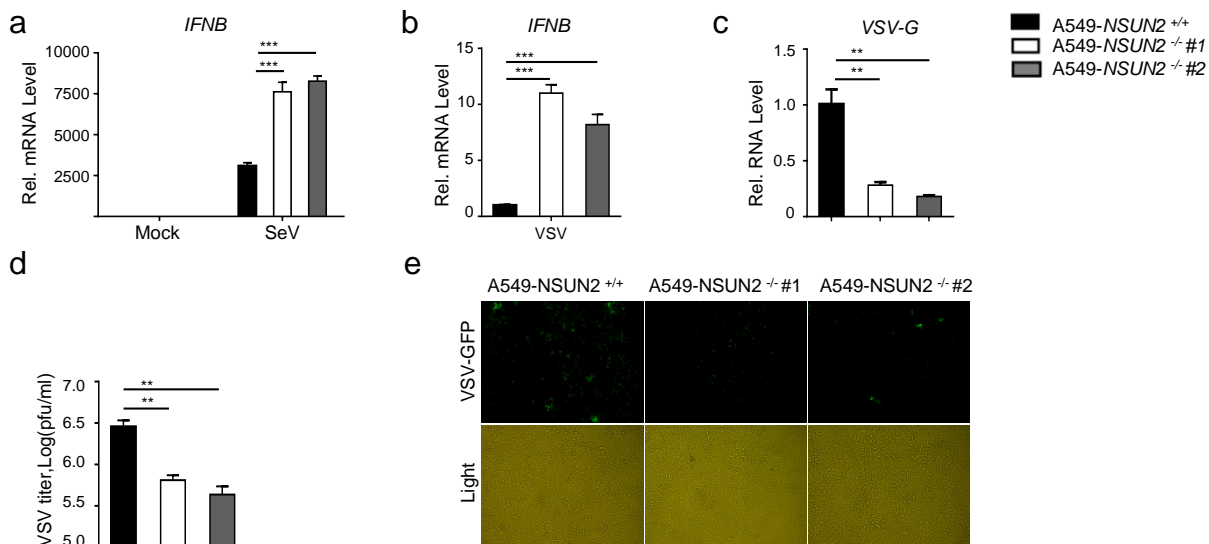

## Supplementary Figure S2

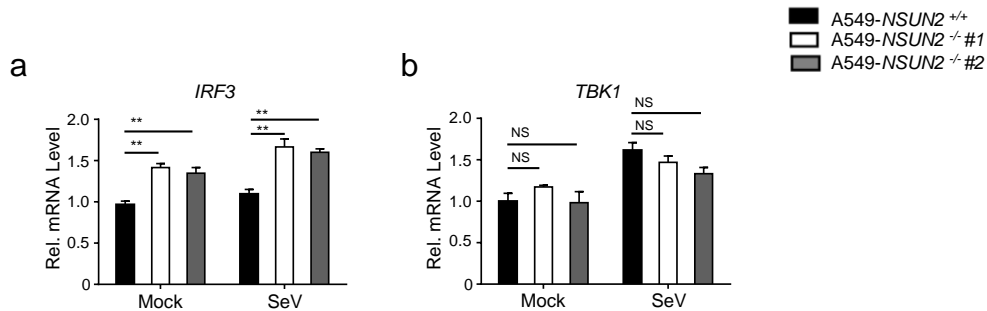

## Supplementary Figure S3

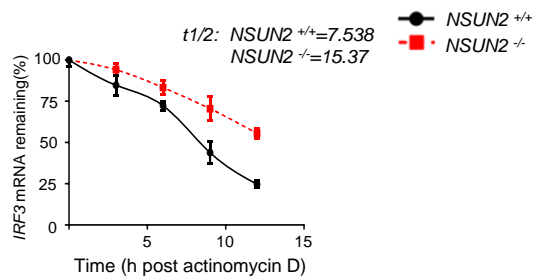

## Supplementary Figure S4

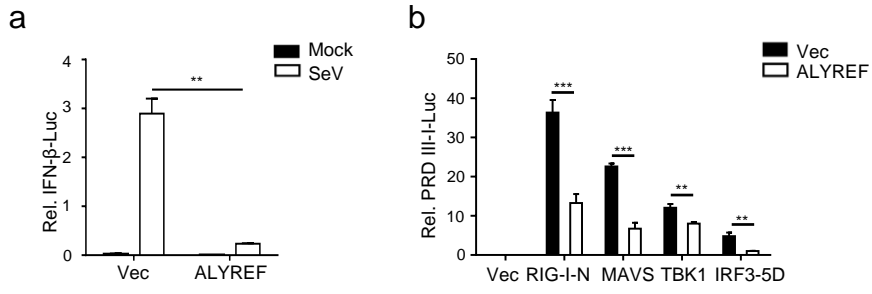



## Supplementary Table S1: Primers for mRNA Quantification

|         | Forward                        | Reverse                     |
|---------|--------------------------------|-----------------------------|
| IFNB1   | AGGACAGGATGAACTTTGAC           | TGATAGACATTAGCCAGGAG        |
| GAPDH   | ATGACATCAAGAAGGTGGTG           | CATACCAGGAAATGAGCTTG        |
| ISG15   | GAGAGGCAGCGAACTCATCTT          | CCAGCATCTTCACCGTCAGG        |
| CXCL10  | GCTCTACTGAGGTGCTATGTTC         | GGAGGATGGCAGTGGAAGTC        |
| IRF3    | AGAGGCTCGTGATGGTCAAG           | AGGTCCACAGTATTCTCCAGG       |
| TBK1    | AGGTCCACAGTATTCTCCAGG          | GCTGCACCAAATCTGTGAGT        |
| NSUN2   | CAAGCTGTTCGAGCACTACTAC         | CTCCCTGAGAGCGTCCATGA        |
| TRDMT1  | CGGGTGCTGGAGCTATACAG           | CGACAGTGTGACATCAATGGC       |
| METTL3  | TTGTCTCCAACCTTCG TAGT          | CCAGATCAGAGAGGTGGTGTAG      |
| METTL14 | AGTGCCGACAGCATTGGTG            | GGAGCAGAGGTATCATAGGAAGC     |
| ALKBH5  | GGAGCAGAGGTATCATAGGAAGC        | CCACCAGCTTTTGGATCACCA       |
| VSV-G   | ACGGCGTACTTCCAGATGG            | CTCGGTTCAAGATCCAGGT         |
| Nsun2   | AGGTGGCTATCCCAGATCG            | GACTCCATGAATTGGTCCCATT      |
| Ifnb1   | CCGAGCAGAGATCTTCAGGAA          | CCTGCAACCACCACTCATTCT       |
| Gapdh   | C GACTTCAACAGCAACTCCC ACTCTTCC | TGGGTGGTCCAGGGTTTCTTACTCCTT |
| Irf3    | GAGAGCCGAACGAGGTT CAG          | CTTCCAGGTTGACACGTCCG        |
| Tbk1    | TCATCTCCGAGAGAACGGCAT          | ACAGAGACACAACTGCTCATC       |
| Isg15   | CCTCTGAGCATCCTGGTGAG           | ACTGGTCTTCGTGGACTTGTT       |
| Cxcl10  | TCAGGCTCGTCAGTTCTAAGTT         | GATGGTGGTTAAGTTCGTGCTT      |
